# Supplementary material
Source: publisher site journal article supplement (https://www.dovepress.com/article/572228)

## Appendix II Inter-item and item-total correlation (Pearson's $r$ ) tables all six competencies (C)

Appendix Table 1. Correlation matrix C1 Evidence-informed decision-making

|            | C1.1 | C1.2 | C1.3 | C1.4 | C1.5 | C1.6 | C1.7 | C1.8 | C1.9 | C1.10 | C1.11 | C1.12 | C1.13 |
|------------|------|------|------|------|------|------|------|------|------|-------|-------|-------|-------|
| C1.1       |      |      |      |      |      |      |      |      |      |       |       |       |       |
| C1.2       | ,783 |      |      |      |      |      |      |      |      |       |       |       |       |
| C1.3       | ,754 | ,687 |      |      |      |      |      |      |      |       |       |       |       |
| C1.4       | ,616 | ,375 | ,618 |      |      |      |      |      |      |       |       |       |       |
| C1.5       | ,664 | ,537 | ,621 | ,854 |      |      |      |      |      |       |       |       |       |
| C1.6       | ,715 | ,625 | ,657 | ,624 | ,752 |      |      |      |      |       |       |       |       |
| C1.7       | ,789 | ,563 | ,646 | ,625 | ,673 | ,684 |      |      |      |       |       |       |       |
| C1.8       | ,733 | ,468 | ,683 | ,792 | ,724 | ,630 | ,743 |      |      |       |       |       |       |
| C1.9       | ,797 | ,618 | ,731 | ,699 | ,754 | ,751 | ,790 | ,791 |      |       |       |       |       |
| C1.10      | ,794 | ,617 | ,751 | ,763 | ,773 | ,754 | ,766 | ,810 | ,922 |       |       |       |       |
| C1.11      | ,742 | ,597 | ,781 | ,679 | ,640 | ,645 | ,717 | ,843 | ,810 | ,825  |       |       |       |
| C1.12      | ,645 | ,472 | ,639 | ,707 | ,771 | ,667 | ,617 | ,681 | ,717 | ,711  | ,682  |       |       |
| C1.13      | ,636 | ,522 | ,675 | ,654 | ,705 | ,581 | ,595 | ,591 | ,747 | ,757  | ,628  | ,780  |       |
| Mean       | ,722 | ,572 | ,687 | ,667 | ,706 | ,673 | ,684 | ,707 | ,761 | ,770  | ,716  | ,674  | ,656  |
| Mean total | ,692 |      |      |      |      |      |      |      |      |       |       |       |       |

Appendix Table 2. Correlation scores between items of C1 and items of C2 (Resources)

|      | C1.1 | C1.2 | C1.3 | C1.4 | C1.5  | C1.6 | C1.7  | C1.8  | C1.9  | C1.10 | C1.11 | C1.12 | C1.13 | Mean  |
|------|------|------|------|------|-------|------|-------|-------|-------|-------|-------|-------|-------|-------|
| C2.1 | ,077 | ,113 | ,137 | ,072 | -,121 | ,139 | ,003  | -,022 | -,084 | -,061 | ,000  | ,054  | ,079  | ,297  |
| C2.2 | ,175 | ,231 | ,126 | ,008 | -,125 | ,105 | -,011 | -,038 | -,056 | -,060 | -,024 | ,077  | ,105  | 0,039 |
| C2.3 | ,586 | ,539 | ,500 | ,559 | ,631  | ,660 | ,513  | ,490  | ,703  | ,695  | ,536  | ,544  | ,626  | ,583  |
| C2.4 | ,636 | ,595 | ,574 | ,554 | ,675  | ,731 | ,629  | ,572  | ,725  | ,730  | ,597  | ,607  | ,659  | ,637  |
| C2.5 | ,568 | ,529 | ,516 | ,479 | ,616  | ,698 | ,554  | ,499  | ,691  | ,661  | ,573  | ,600  | ,608  | ,584  |
| C2.6 | ,649 | ,615 | ,609 | ,544 | ,674  | ,722 | ,601  | ,591  | ,738  | ,707  | ,654  | ,641  | ,656  | ,646  |
| C2.7 | ,709 | ,668 | ,596 | ,559 | ,650  | ,730 | ,643  | ,570  | ,726  | ,747  | ,626  | ,601  | ,694  | ,655  |

|       |      |      |      |      |      |      |      |      |      |      |      |      |      |      |
|-------|------|------|------|------|------|------|------|------|------|------|------|------|------|------|
| C2.8  | ,649 | ,564 | ,590 | ,579 | ,657 | ,748 | ,713 | ,621 | ,752 | ,737 | ,589 | ,594 | ,633 | ,648 |
| C2.9  | ,628 | ,431 | ,578 | ,522 | ,553 | ,577 | ,668 | ,591 | ,710 | ,677 | ,670 | ,488 | ,653 | ,596 |
| C2.10 | ,541 | ,443 | ,604 | ,443 | ,509 | ,614 | ,517 | ,500 | ,608 | ,592 | ,627 | ,499 | ,713 | ,555 |
| C2.11 | ,574 | ,562 | ,627 | ,448 | ,498 | ,569 | ,505 | ,514 | ,636 | ,645 | ,662 | ,524 | ,755 | ,578 |
| C2.12 | ,546 | ,502 | ,580 | ,503 | ,627 | ,624 | ,515 | ,582 | ,676 | ,661 | ,648 | ,632 | ,708 | ,600 |
| C2.13 | ,511 | ,507 | ,543 | ,318 | ,403 | ,414 | ,434 | ,381 | ,525 | ,432 | ,453 | ,388 | ,573 | ,452 |
| C2.14 | ,451 | ,346 | ,478 | ,324 | ,415 | ,472 | ,505 | ,428 | ,590 | ,524 | ,528 | ,400 | ,468 | ,456 |
| C2.15 | ,610 | ,507 | ,580 | ,504 | ,581 | ,701 | ,521 | ,488 | ,705 | ,654 | ,567 | ,571 | ,725 | ,593 |
| C2.16 | ,668 | ,533 | ,700 | ,604 | ,580 | ,683 | ,556 | ,627 | ,713 | ,690 | ,674 | ,596 | ,740 | ,643 |
| C2.17 | ,692 | ,577 | ,546 | ,543 | ,644 | ,718 | ,681 | ,664 | ,781 | ,705 | ,588 | ,651 | ,689 | ,652 |

*Appendix Table 3. Correlation scores between items of C1 and items of C3 (Knowledge)*

|       | C1.1 | C1.2 | C1.3 | C1.4 | C1.5 | C1.6 | C1.7 | C1.8 | C1.9 | C1.10 | C1.11 | C1.12 | C1.13 | Mean |
|-------|------|------|------|------|------|------|------|------|------|-------|-------|-------|-------|------|
| C3.1  | ,488 | ,534 | ,558 | ,415 | ,500 | ,603 | ,478 | ,471 | ,511 | ,487  | ,585  | ,471  | ,528  | ,510 |
| C3.2  | ,468 | ,429 | ,501 | ,466 | ,534 | ,603 | ,562 | ,456 | ,547 | ,568  | ,531  | ,467  | ,545  | ,514 |
| C3.3  | ,464 | ,369 | ,433 | ,502 | ,586 | ,617 | ,518 | ,454 | ,576 | ,544  | ,502  | ,518  | ,593  | ,514 |
| C3.4  | ,510 | ,455 | ,547 | ,463 | ,528 | ,591 | ,421 | ,398 | ,553 | ,536  | ,491  | ,500  | ,603  | ,507 |
| C3.5  | ,454 | ,369 | ,487 | ,415 | ,536 | ,591 | ,498 | ,344 | ,598 | ,556  | ,461  | ,570  | ,703  | ,506 |
| C3.6  | ,490 | ,268 | ,543 | ,577 | ,469 | ,594 | ,437 | ,472 | ,550 | ,547  | ,467  | ,568  | ,647  | ,510 |
| C3.7  | ,580 | ,442 | ,701 | ,603 | ,627 | ,720 | ,612 | ,661 | ,750 | ,713  | ,697  | ,655  | ,718  | ,652 |
| C3.8  | ,567 | ,463 | ,638 | ,382 | ,468 | ,556 | ,482 | ,501 | ,601 | ,591  | ,586  | ,625  | ,686  | ,550 |
| C3.9  | ,504 | ,411 | ,546 | ,399 | ,470 | ,601 | ,419 | ,384 | ,488 | ,522  | ,468  | ,496  | ,547  | ,481 |
| C3.10 | ,488 | ,379 | ,498 | ,505 | ,547 | ,583 | ,546 | ,448 | ,504 | ,537  | ,504  | ,424  | ,543  | ,500 |
| C3.11 | ,573 | ,446 | ,482 | ,467 | ,542 | ,603 | ,589 | ,549 | ,628 | ,592  | ,587  | ,529  | ,601  | ,553 |

*Appendix Table 4. Correlation scores between items of C1 and items of C4 (Communication)*

|      | C1.1 | C1.2 | C1.3 | C1.4 | C1.5 | C1.6 | C1.7 | C1.8 | C1.9 | C1.10 | C1.11 | C1.12 | C1.13 | Mean |
|------|------|------|------|------|------|------|------|------|------|-------|-------|-------|-------|------|
| C4.1 | ,393 | ,438 | ,477 | ,260 | ,418 | ,458 | ,325 | ,339 | ,415 | ,399  | ,459  | ,393  | ,424  | ,400 |
| C4.2 | ,360 | ,312 | ,427 | ,258 | ,346 | ,370 | ,315 | ,257 | ,338 | ,368  | ,350  | ,332  | ,411  | ,342 |
| C4.3 | ,446 | ,358 | ,363 | ,236 | ,330 | ,419 | ,373 | ,341 | ,399 | ,408  | ,393  | ,347  | ,377  | ,368 |
| C4.4 | ,448 | ,346 | ,417 | ,329 | ,482 | ,498 | ,454 | ,406 | ,540 | ,534  | ,478  | ,431  | ,472  | ,449 |
| C4.5 | ,493 | ,350 | ,407 | ,438 | ,533 | ,518 | ,591 | ,438 | ,607 | ,562  | ,479  | ,578  | ,566  | ,505 |
| C4.6 | ,374 | ,368 | ,459 | ,413 | ,477 | ,425 | ,515 | ,365 | ,445 | ,495  | ,464  | ,477  | ,649  | ,456 |
| C4.7 | ,279 | ,233 | ,465 | ,317 | ,357 | ,379 | ,308 | ,394 | ,408 | ,422  | ,535  | ,278  | ,380  | ,366 |

|       |      |      |      |      |      |      |      |      |      |      |      |      |      |      |
|-------|------|------|------|------|------|------|------|------|------|------|------|------|------|------|
| C4.8  | ,462 | ,258 | ,406 | ,374 | ,490 | ,481 | ,511 | ,496 | ,529 | ,545 | ,501 | ,455 | ,560 | ,467 |
| C4.9  | ,408 | ,334 | ,367 | ,412 | ,530 | ,447 | ,471 | ,552 | ,547 | ,580 | ,542 | ,420 | ,399 | ,462 |
| C4.10 | ,484 | ,321 | ,471 | ,400 | ,589 | ,528 | ,553 | ,519 | ,596 | ,561 | ,499 | ,529 | ,607 | ,512 |
| C4.11 | ,454 | ,405 | ,395 | ,403 | ,590 | ,475 | ,496 | ,508 | ,637 | ,565 | ,488 | ,542 | ,574 | ,502 |
| C4.12 | ,365 | ,196 | ,379 | ,343 | ,469 | ,419 | ,488 | ,478 | ,519 | ,484 | ,516 | ,412 | ,501 | ,428 |
| C4.13 | ,474 | ,425 | ,601 | ,442 | ,497 | ,481 | ,472 | ,441 | ,572 | ,551 | ,599 | ,548 | ,627 | ,518 |
| C4.14 | ,387 | ,313 | ,446 | ,259 | ,354 | ,329 | ,306 | ,356 | ,466 | ,431 | ,476 | ,439 | ,656 | ,401 |
| C4.15 | ,446 | ,417 | ,484 | ,400 | ,408 | ,310 | ,386 | ,432 | ,504 | ,481 | ,477 | ,329 | ,567 | ,434 |
| C4.16 | ,439 | ,329 | ,435 | ,376 | ,477 | ,429 | ,445 | ,493 | ,523 | ,509 | ,430 | ,414 | ,454 | ,443 |
| C4.17 | ,339 | ,249 | ,225 | ,160 | ,317 | ,288 | ,316 | ,265 | ,360 | ,337 | ,253 | ,323 | ,526 | ,304 |

*Appendix Table 5. Correlation scores between items of C1 and items of C5 (Leadership)*

|       | C1.1 | C1.2 | C1.3 | C1.4 | C1.5 | C1.6 | C1.7 | C1.8 | C1.9 | C1.10 | C1.11 | C1.12 | C1.13 | Mean |
|-------|------|------|------|------|------|------|------|------|------|-------|-------|-------|-------|------|
| C5.1  | ,546 | ,391 | ,585 | ,426 | ,560 | ,519 | ,513 | ,512 | ,622 | ,598  | ,578  | ,603  | ,696  | ,550 |
| C5.2  | ,529 | ,447 | ,542 | ,451 | ,581 | ,501 | ,517 | ,495 | ,614 | ,606  | ,514  | ,534  | ,653  | ,537 |
| C5.3  | ,540 | ,435 | ,535 | ,447 | ,578 | ,622 | ,539 | ,554 | ,667 | ,631  | ,589  | ,496  | ,541  | ,552 |
| C5.4  | ,486 | ,333 | ,565 | ,413 | ,506 | ,608 | ,553 | ,573 | ,648 | ,638  | ,552  | ,515  | ,630  | ,54  |
| C5.5  | ,527 | ,427 | ,523 | ,505 | ,617 | ,564 | ,478 | ,506 | ,651 | ,658  | ,514  | ,577  | ,689  | ,557 |
| C5.6  | ,578 | ,481 | ,603 | ,468 | ,611 | ,597 | ,551 | ,575 | ,693 | ,673  | ,638  | ,636  | ,717  | ,602 |
| C5.7  | ,559 | ,546 | ,516 | ,486 | ,663 | ,636 | ,642 | ,526 | ,682 | ,647  | ,616  | ,622  | ,634  | ,598 |
| C5.8  | ,464 | ,382 | ,433 | ,376 | ,557 | ,510 | ,559 | ,473 | ,603 | ,593  | ,515  | ,477  | ,570  | ,501 |
| C5.9  | ,503 | ,274 | ,483 | ,514 | ,603 | ,603 | ,565 | ,594 | ,665 | ,598  | ,602  | ,560  | ,600  | ,551 |
| C5.10 | ,491 | ,404 | ,512 | ,369 | ,536 | ,485 | ,523 | ,502 | ,613 | ,579  | ,568  | ,526  | ,617  | ,517 |
| C5.11 | ,461 | ,394 | ,411 | ,359 | ,585 | ,538 | ,494 | ,409 | ,599 | ,529  | ,460  | ,599  | ,582  | ,494 |
| C5.12 | ,416 | ,423 | ,456 | ,327 | ,537 | ,503 | ,436 | ,410 | ,546 | ,475  | ,466  | ,549  | ,606  | ,473 |
| C5.13 | ,417 | ,398 | ,543 | ,391 | ,498 | ,406 | ,427 | ,535 | ,551 | ,503  | ,609  | ,482  | ,493  | ,481 |

*Appendix Table 6. Correlation scores between items of C1 and items of C6 (Change)*

|      | C1.1 | C1.2 | C1.3 | C1.4 | C1.5 | C1.6 | C1.7 | C1.8 | C1.9 | C1.10 | C1.11 | C1.12 | C1.13 | Mean |
|------|------|------|------|------|------|------|------|------|------|-------|-------|-------|-------|------|
| C6.1 | ,582 | ,461 | ,625 | ,502 | ,600 | ,622 | ,553 | ,525 | ,687 | ,692  | ,597  | ,554  | ,738  | ,595 |
| C6.2 | ,556 | ,480 | ,478 | ,454 | ,564 | ,702 | ,545 | ,522 | ,707 | ,677  | ,582  | ,581  | ,702  | ,581 |
| C6.3 | ,535 | ,439 | ,537 | ,496 | ,556 | ,598 | ,536 | ,613 | ,700 | ,675  | ,644  | ,505  | ,687  | ,579 |
| C6.4 | ,579 | ,448 | ,481 | ,490 | ,585 | ,575 | ,526 | ,606 | ,705 | ,701  | ,584  | ,520  | ,656  | ,574 |
| C6.5 | ,500 | ,331 | ,504 | ,492 | ,561 | ,638 | ,518 | ,524 | ,687 | ,625  | ,609  | ,486  | ,665  | ,549 |
| C6.6 | ,596 | ,470 | ,539 | ,484 | ,589 | ,643 | ,609 | ,546 | ,749 | ,710  | ,623  | ,583  | ,725  | ,605 |
| C6.7 | ,586 | ,452 | ,620 | ,547 | ,577 | ,571 | ,549 | ,579 | ,750 | ,702  | ,676  | ,568  | ,761  | ,611 |

|      |      |      |      |      |      |      |      |      |      |      |      |      |      |      |
|------|------|------|------|------|------|------|------|------|------|------|------|------|------|------|
| C6.8 | ,632 | ,475 | ,556 | ,538 | ,603 | ,626 | ,615 | ,611 | ,808 | ,732 | ,672 | ,568 | ,715 | ,627 |
| C6.9 | ,614 | ,447 | ,596 | ,536 | ,572 | ,558 | ,624 | ,633 | ,752 | ,695 | ,719 | ,506 | ,668 | ,609 |

**Appendix Table 7. Correlation matrix C2 Operations, Administration and Resource Management<sup>a</sup>**

|            | C2.1          | C2.2  | C2.3          | C2.4          | C2.5          | C2.6          | C2.7          | C2.8          | C2.9          | C2.10         | C2.11         | C2.12         | C2.13         | C2.14         | C2.15         | C2.16         | C2.17         |
|------------|---------------|-------|---------------|---------------|---------------|---------------|---------------|---------------|---------------|---------------|---------------|---------------|---------------|---------------|---------------|---------------|---------------|
| C2.1       |               |       |               |               |               |               |               |               |               |               |               |               |               |               |               |               |               |
| C2.2       | ,861          |       |               |               |               |               |               |               |               |               |               |               |               |               |               |               |               |
| C2.3       | ,053          | ,022  |               |               |               |               |               |               |               |               |               |               |               |               |               |               |               |
| C2.4       | ,124          | ,068  | ,919          |               |               |               |               |               |               |               |               |               |               |               |               |               |               |
| C2.5       | ,057          | -,023 | ,889          | ,912          |               |               |               |               |               |               |               |               |               |               |               |               |               |
| C2.6       | ,098          | ,045  | ,883          | ,952          | ,930          |               |               |               |               |               |               |               |               |               |               |               |               |
| C2.7       | ,128          | ,002  | ,838          | ,863          | ,853          | ,875          |               |               |               |               |               |               |               |               |               |               |               |
| C2.8       | ,128          | ,044  | ,674          | ,799          | ,737          | ,777          | ,854          |               |               |               |               |               |               |               |               |               |               |
| C2.9       | ,167          | ,066  | ,638          | ,732          | ,624          | ,711          | ,700          | ,655          |               |               |               |               |               |               |               |               |               |
| C2.10      | ,196          | ,114  | ,674          | ,759          | ,712          | ,783          | ,749          | ,648          | ,872          |               |               |               |               |               |               |               |               |
| C2.11      | ,196          | ,154  | ,677          | ,734          | ,647          | ,741          | ,768          | ,609          | ,810          | ,886          |               |               |               |               |               |               |               |
| C2.12      | -,052         | -,017 | ,729          | ,827          | ,800          | ,865          | ,783          | ,710          | ,773          | ,846          | ,802          |               |               |               |               |               |               |
| C2.13      | ,344          | ,222  | ,440          | ,578          | ,530          | ,619          | ,607          | ,510          | ,620          | ,615          | ,605          | ,603          |               |               |               |               |               |
| C2.14      | ,162          | ,026  | ,356          | ,460          | ,456          | ,518          | ,423          | ,438          | ,619          | ,491          | ,528          | ,482          | ,648          |               |               |               |               |
| C2.15      | ,096          | ,122  | ,686          | ,682          | ,700          | ,724          | ,706          | ,637          | ,643          | ,692          | ,693          | ,656          | ,606          | ,624          |               |               |               |
| C2.16      | ,074          | ,132  | ,679          | ,707          | ,653          | ,733          | ,693          | ,665          | ,639          | ,741          | ,752          | ,689          | ,575          | ,481          | ,828          |               |               |
| C2.17      | ,065          | ,077  | ,683          | ,794          | ,739          | ,780          | ,789          | ,853          | ,632          | ,614          | ,582          | ,727          | ,583          | ,507          | ,507          | ,791          |               |
| Mean       | ,169          | ,120  | ,615/<br>,698 | ,682/<br>,766 | ,639/<br>,727 | ,690/<br>,778 | ,664/<br>,750 | ,609/<br>,683 | ,619/<br>,691 | ,650/<br>,720 | ,637/<br>,702 | ,639/<br>,735 | ,544/<br>,581 | ,451/<br>,502 | ,615/<br>,687 | ,615/<br>,688 | ,608/<br>,684 |
| Mean total | ,563/<br>,693 |       |               |               |               |               |               |               |               |               |               |               |               |               |               |               |               |

**Appendix Table 8. Correlation scores between items of C2 and items of C1**

|       | C2.1  | C2.2  | C2.3 | C2.4 | C2.5 | C2.6 | C2.7 | C2.8 | C2.9 | C2.10 | C2.11 | C2.12 | C2.13 | C2.14 | C2.15 | C2.16 | C2.17 | Mean          |
|-------|-------|-------|------|------|------|------|------|------|------|-------|-------|-------|-------|-------|-------|-------|-------|---------------|
| C1.1  | ,077  | ,175  | ,586 | ,636 | ,568 | ,649 | ,709 | ,649 | ,628 | ,541  | ,574  | ,546  | ,511  | ,451  | ,610  | ,668  | ,692  | ,545/<br>,601 |
| C1.2  | ,113  | ,231  | ,539 | ,539 | ,529 | ,615 | ,668 | ,564 | ,431 | ,443  | ,562  | ,502  | ,507  | ,346  | ,507  | ,533  | ,577  | ,483/<br>,524 |
| C1.3  | ,137  | ,126  | ,500 | ,574 | ,516 | ,609 | ,596 | ,590 | ,578 | ,604  | ,627  | ,580  | ,543  | ,478  | ,580  | ,700  | ,546  | ,523/<br>,575 |
| C1.4  | ,072  | ,008  | ,559 | ,554 | ,479 | ,544 | ,559 | ,579 | ,522 | ,443  | ,448  | ,503  | ,318  | ,324  | ,504  | ,604  | ,543  | ,445/<br>,499 |
| C1.5  | -,121 | -,125 | ,631 | ,675 | ,616 | ,674 | ,650 | ,657 | ,553 | ,509  | ,498  | ,627  | ,403  | ,415  | ,581  | ,580  | ,644  | ,498/<br>,581 |
| C1.6  | ,139  | ,105  | ,660 | ,731 | ,698 | ,722 | ,730 | ,748 | ,577 | ,614  | ,569  | ,624  | ,414  | ,472  | ,701  | ,683  | ,718  | ,583/<br>,644 |
| C1.7  | ,003  | -,011 | ,513 | ,629 | ,554 | ,601 | ,643 | ,713 | ,668 | ,517  | ,505  | ,515  | ,434  | ,505  | ,521  | ,556  | ,681  | ,503/<br>,570 |
| C1.8  | -,022 | -,038 | ,490 | ,572 | ,499 | ,591 | ,570 | ,621 | ,591 | ,500  | ,514  | ,582  | ,381  | ,428  | ,488  | ,627  | ,664  | ,474/<br>,541 |
| C1.9  | -,084 | -,056 | ,703 | ,725 | ,691 | ,738 | ,726 | ,752 | ,710 | ,608  | ,636  | ,676  | ,525  | ,590  | ,705  | ,713  | ,781  | ,596/<br>,685 |
| C1.10 | -,061 | -,060 | ,695 | ,730 | ,661 | ,707 | ,747 | ,737 | ,677 | ,592  | ,645  | ,661  | ,432  | ,524  | ,654  | ,690  | ,705  | ,573/<br>,657 |
| C1.11 | ,000  | -,024 | ,536 | ,597 | ,573 | ,654 | ,626 | ,589 | ,670 | ,627  | ,662  | ,648  | ,453  | ,528  | ,567  | ,674  | ,588  | ,528/<br>,599 |
| C1.12 | ,054  | ,077  | ,544 | ,607 | ,600 | ,641 | ,601 | ,594 | ,488 | ,499  | ,524  | ,632  | ,388  | ,400  | ,571  | ,596  | ,651  | ,498/<br>,556 |
| C1.13 | ,079  | ,105  | ,626 | ,659 | ,608 | ,656 | ,694 | ,633 | ,653 | ,713  | ,755  | ,708  | ,573  | ,468  | ,725  | ,740  | ,689  | ,593/<br>,660 |

<sup>a</sup> Mean and mean total scores involving C2 is reported first with items 2.1 and 2.2, and second without items 2.1 and 2.2

*Appendix Table 9. Correlation scores between items of C2 and items of C3*

|       | C2.1 | C2.2      | C2.3 | C2.4 | C2.5 | C2.6 | C2.7 | C2.8 | C2.9 | C2.10 | C2.11 | C2.12 | C2.13 | C2.14 | C2.15 | C2.16 | C2.17 | Mean          |
|-------|------|-----------|------|------|------|------|------|------|------|-------|-------|-------|-------|-------|-------|-------|-------|---------------|
| C3.1  | ,191 | ,100      | ,539 | ,623 | ,638 | ,665 | ,764 | ,675 | ,566 | ,679  | ,698  | ,662  | ,607  | ,536  | ,569  | ,586  | ,656  | ,574/<br>,631 |
| C3.2  | ,094 | -<br>,047 | ,594 | ,695 | ,703 | ,679 | ,774 | ,680 | ,628 | ,662  | ,655  | ,618  | ,581  | ,563  | ,623  | ,558  | ,680  | ,573/<br>,646 |
| C3.3  | ,170 | ,060      | ,644 | ,699 | ,736 | ,713 | ,717 | ,646 | ,636 | ,694  | ,655  | ,621  | ,554  | ,540  | ,700  | ,582  | ,682  | ,591/<br>,655 |
| C3.4  | ,320 | ,168      | ,602 | ,628 | ,579 | ,639 | ,608 | ,533 | ,640 | ,659  | ,662  | ,498  | ,617  | ,606  | ,691  | ,600  | ,575  | ,566/<br>,609 |
| C3.5  | ,194 | ,077      | ,712 | ,704 | ,691 | ,683 | ,756 | ,595 | ,648 | ,693  | ,721  | ,625  | ,554  | ,459  | ,720  | ,593  | ,570  | ,588/<br>,648 |
| C3.6  | ,526 | ,437      | ,534 | ,602 | ,553 | ,601 | ,549 | ,522 | ,694 | ,694  | ,677  | ,554  | ,521  | ,448  | ,622  | ,721  | ,552  | ,577/<br>,590 |
| C3.7  | ,004 | -<br>,071 | ,602 | ,670 | ,692 | ,725 | ,655 | ,704 | ,589 | ,677  | ,639  | ,731  | ,485  | ,514  | ,738  | ,839  | ,744  | ,585/<br>,667 |
| C3.8  | ,184 | ,178      | ,538 | ,592 | ,622 | ,672 | ,634 | ,583 | ,479 | ,610  | ,671  | ,641  | ,442  | ,487  | ,668  | ,703  | ,644  | ,550/<br>,599 |
| C3.9  | ,446 | ,219      | ,577 | ,706 | ,640 | ,680 | ,658 | ,599 | ,659 | ,663  | ,667  | ,554  | ,600  | ,580  | ,585  | ,534  | ,591  | ,586/<br>,620 |
| C3.10 | ,066 | -<br>,014 | ,494 | ,612 | ,567 | ,593 | ,626 | ,597 | ,664 | ,666  | ,674  | ,593  | ,521  | ,453  | ,618  | ,603  | ,547  | ,522/<br>,589 |
| C3.11 | ,126 | ,089      | ,534 | ,633 | ,621 | ,646 | ,699 | ,662 | ,704 | ,663  | ,689  | ,700  | ,606  | ,600  | ,714  | ,635  | ,712  | ,590/<br>,655 |

*Appendix Table 10. Correlation scores between items of C2 and items of C4*

|       | C2.1      | C2.2      | C2.3 | C2.4 | C2.5 | C2.6 | C2.7 | C2.8 | C2.9 | C2.10 | C2.11 | C2.12 | C2.13 | C2.14 | C2.15 | C2.16 | C2.17 | Mean          |
|-------|-----------|-----------|------|------|------|------|------|------|------|-------|-------|-------|-------|-------|-------|-------|-------|---------------|
| C4.1  | ,181      | ,025      | ,318 | ,392 | ,405 | ,472 | ,398 | ,321 | ,522 | ,492  | ,574  | ,420  | ,466  | ,677  | ,468  | ,378  | ,371  | ,405/<br>,445 |
| C4.2  | ,461      | ,276      | ,237 | ,330 | ,352 | ,376 | ,325 | ,234 | ,457 | ,424  | ,472  | ,280  | ,543  | ,637  | ,402  | ,321  | ,263  | ,376/<br>,377 |
| C4.3  | ,448      | ,243      | ,212 | ,329 | ,337 | ,389 | ,402 | ,324 | ,452 | ,374  | ,454  | ,308  | ,572  | ,682  | ,408  | ,326  | ,371  | ,390/<br>,396 |
| C4.4  | ,096      | -<br>,088 | ,336 | ,412 | ,495 | ,511 | ,509 | ,428 | ,517 | ,458  | ,435  | ,449  | ,567  | ,682  | ,555  | ,355  | ,448  | ,421/<br>,477 |
| C4.5  | ,142      | ,086      | ,408 | ,456 | ,511 | ,548 | ,538 | ,548 | ,436 | ,422  | ,392  | ,473  | ,351  | ,553  | ,505  | ,451  | ,585  | ,436/<br>,478 |
| C4.6  | ,116      | -<br>,005 | ,437 | ,485 | ,510 | ,516 | ,546 | ,459 | ,506 | ,577  | ,618  | ,470  | ,450  | ,410  | ,567  | ,538  | ,420  | ,448/<br>,501 |
| C4.7  | ,049      | -<br>,129 | ,339 | ,385 | ,501 | ,501 | ,500 | ,417 | ,469 | ,542  | ,513  | ,450  | ,487  | ,490  | ,523  | ,546  | ,347  | ,408/<br>,467 |
| C4.8  | ,062      | -<br>,113 | ,310 | ,398 | ,453 | ,466 | ,450 | ,454 | ,541 | ,530  | ,510  | ,480  | ,410  | ,678  | ,552  | ,454  | ,465  | ,418/<br>,477 |
| C4.9  | -<br>,161 | -<br>,242 | ,310 | ,398 | ,423 | ,482 | ,428 | ,377 | ,375 | ,330  | ,329  | ,377  | ,329  | ,543  | ,318  | ,327  | ,436  | ,316/<br>,385 |
| C4.10 | ,026      | -<br>,146 | ,362 | ,476 | ,469 | ,541 | ,499 | ,533 | ,608 | ,555  | ,539  | ,558  | ,507  | ,791  | ,611  | ,474  | ,579  | ,470/<br>,540 |
| C4.11 | -<br>,062 | -<br>,127 | ,440 | ,524 | ,521 | ,563 | ,492 | ,508 | ,506 | ,449  | ,458  | ,595  | ,455  | ,614  | ,462  | ,463  | ,620  | ,440/<br>,511 |
| C4.12 | -<br>,032 | -<br>,181 | ,264 | ,334 | ,407 | ,442 | ,397 | ,380 | ,539 | ,513  | ,491  | ,441  | ,420  | ,593  | ,537  | ,442  | ,391  | ,375/<br>,439 |

|       |            |            |      |      |      |      |      |      |      |      |      |      |      |      |      |      |      |               |
|-------|------------|------------|------|------|------|------|------|------|------|------|------|------|------|------|------|------|------|---------------|
| C4.13 | ,009       | -,<br>,123 | ,372 | ,464 | ,524 | ,571 | ,586 | ,568 | ,487 | ,558 | ,606 | ,548 | ,606 | ,571 | ,625 | ,505 | ,482 | ,468/<br>,538 |
| C4.14 | ,050       | -,<br>,122 | ,453 | ,535 | ,572 | ,605 | ,608 | ,448 | ,578 | ,670 | ,689 | ,683 | ,723 | ,582 | ,597 | ,606 | ,551 | ,519/<br>,593 |
| C4.15 | ,137       | ,093       | ,468 | ,544 | ,540 | ,598 | ,512 | ,417 | ,470 | ,523 | ,530 | ,503 | ,633 | ,487 | ,506 | ,645 | ,602 | ,482/<br>,532 |
| C4.16 | -,<br>,080 | -,<br>,195 | ,497 | ,622 | ,598 | ,597 | ,552 | ,557 | ,514 | ,450 | ,451 | ,431 | ,587 | ,519 | ,523 | ,460 | ,586 | ,451/<br>,530 |
| C4.17 | ,043       | -,<br>,095 | ,267 | ,391 | ,409 | ,427 | ,480 | ,385 | ,483 | ,485 | ,509 | ,485 | ,610 | ,554 | ,470 | ,409 | ,483 | ,400/<br>,456 |

*Appendix Table 11. Correlation scores between items of C2 and items of C5*

|       | C2.1       | C2.2       | C2.3 | C2.4 | C2.5 | C2.6 | C2.7 | C2.8 | C2.9 | C2.10 | C2.11 | C2.12 | C2.13 | C2.14 | C2.15 | C2.16 | C2.17 | Mean          |
|-------|------------|------------|------|------|------|------|------|------|------|-------|-------|-------|-------|-------|-------|-------|-------|---------------|
| C5.1  | ,004       | -,<br>,096 | ,545 | ,669 | ,713 | ,743 | ,627 | ,602 | ,655 | ,698  | ,645  | ,681  | ,667  | ,674  | ,691  | ,636  | ,640  | ,576/<br>,659 |
| C5.2  | ,112       | -,<br>,068 | ,567 | ,707 | ,685 | ,755 | ,661 | ,647 | ,655 | ,646  | ,624  | ,661  | ,697  | ,676  | ,664  | ,610  | ,647  | ,585/<br>,660 |
| C5.3  | -,<br>,015 | -,<br>,136 | ,520 | ,611 | ,645 | ,673 | ,589 | ,575 | ,577 | ,560  | ,544  | ,572  | ,635  | ,633  | ,645  | ,627  | ,586  | ,520/<br>,599 |
| C5.4  | ,122       | -,<br>,028 | ,573 | ,668 | ,656 | ,676 | ,624 | ,647 | ,591 | ,601  | ,600  | ,570  | ,610  | ,729  | ,740  | ,708  | ,716  | ,577/<br>,647 |
| C5.5  | ,055       | -,<br>,073 | ,541 | ,611 | ,596 | ,652 | ,635 | ,593 | ,593 | ,595  | ,593  | ,602  | ,642  | ,579  | ,735  | ,658  | ,597  | ,541/<br>,615 |
| C5.6  | -,<br>,157 | -,<br>,195 | ,518 | ,586 | ,616 | ,672 | ,603 | ,573 | ,492 | ,580  | ,575  | ,640  | ,579  | ,597  | ,693  | ,683  | ,630  | ,511/<br>,602 |
| C5.7  | -,<br>,070 | -,<br>,080 | ,615 | ,692 | ,723 | ,751 | ,655 | ,613 | ,528 | ,603  | ,576  | ,692  | ,488  | ,553  | ,606  | ,567  | ,601  | ,536/<br>,618 |
| C5.8  | -,<br>,077 | -,<br>,132 | ,542 | ,653 | ,651 | ,667 | ,572 | ,548 | ,534 | ,562  | ,530  | ,594  | ,483  | ,586  | ,496  | ,534  | ,574  | ,489/<br>,568 |
| C5.9  | -,<br>,091 | -,<br>,196 | ,495 | ,558 | ,586 | ,602 | ,555 | ,515 | ,613 | ,603  | ,565  | ,584  | ,495  | ,553  | ,642  | ,638  | ,581  | ,488/<br>,572 |
| C5.10 | ,022       | -,<br>,123 | ,550 | ,656 | ,650 | ,702 | ,642 | ,585 | ,694 | ,657  | ,650  | ,709  | ,581  | ,699  | ,582  | ,543  | ,603  | ,553/<br>,634 |
| C5.11 | -,<br>,156 | -,<br>,174 | ,493 | ,587 | ,609 | ,618 | ,527 | ,550 | ,469 | ,445  | ,424  | ,656  | ,447  | ,599  | ,552  | ,536  | ,649  | ,461/<br>,544 |
| C5.12 | ,008       | -,<br>,100 | ,451 | ,546 | ,597 | ,609 | ,572 | ,528 | ,493 | ,509  | ,496  | ,648  | ,712  | ,577  | ,643  | ,550  | ,592  | ,496/<br>,568 |
| C5.13 | ,532       | -,<br>,060 | ,548 | ,581 | ,645 | ,681 | ,521 | ,409 | ,466 | ,525  | ,470  | ,582  | ,500  | ,413  | ,411  | ,481  | ,476  | ,481/<br>,514 |

*Appendix Table 12. Correlation scores between items of C2 and items of C6*

|      | C2.1       | C2.2  | C2.3 | C2.4 | C2.5 | C2.6 | C2.7 | C2.8 | C2.9 | C2.10 | C2.11 | C2.12 | C2.13 | C2.14 | C2.15 | C2.16 | C2.17 | Mean          |
|------|------------|-------|------|------|------|------|------|------|------|-------|-------|-------|-------|-------|-------|-------|-------|---------------|
| C6.1 | -,<br>,003 | -,072 | ,675 | ,733 | ,667 | ,737 | ,689 | ,644 | ,739 | ,744  | ,738  | ,718  | ,600  | ,694  | ,840  | ,794  | ,699  | ,626/<br>,714 |
| C6.2 | ,032       | ,041  | ,696 | ,743 | ,723 | ,752 | ,759 | ,738 | ,657 | ,718  | ,721  | ,730  | ,582  | ,572  | ,816  | ,736  | ,743  | ,633/<br>,712 |
| C6.3 | ,160       | ,025  | ,625 | ,694 | ,660 | ,731 | ,661 | ,654 | ,692 | ,710  | ,708  | ,642  | ,606  | ,683  | ,755  | ,724  | ,708  | ,614/<br>,684 |
| C6.4 | ,057       | -,030 | ,665 | ,739 | ,674 | ,729 | ,740 | ,737 | ,727 | ,681  | ,684  | ,703  | ,592  | ,616  | ,693  | ,653  | ,719  | ,611/<br>,690 |
| C6.5 | -,<br>,010 | -,042 | ,667 | ,651 | ,672 | ,692 | ,700 | ,638 | ,725 | ,777  | ,747  | ,701  | ,468  | ,500  | ,798  | ,754  | ,634  | ,592/<br>,674 |

|      |       |       |      |      |      |      |      |      |      |      |      |      |      |      |      |      |      |               |
|------|-------|-------|------|------|------|------|------|------|------|------|------|------|------|------|------|------|------|---------------|
| C6.6 | ,130  | ,010  | ,684 | ,749 | ,738 | ,780 | ,806 | ,773 | ,734 | ,724 | ,708 | ,755 | ,649 | ,632 | ,772 | ,700 | ,746 | ,652/<br>,730 |
| C6.7 | ,011  | -,031 | ,607 | ,659 | ,656 | ,709 | ,694 | ,664 | ,726 | ,717 | ,667 | ,734 | ,709 | ,631 | ,777 | ,737 | ,707 | ,610/<br>,692 |
| C6.8 | -,109 | -,043 | ,670 | ,701 | ,746 | ,763 | ,673 | ,693 | ,686 | ,674 | ,579 | ,743 | ,569 | ,591 | ,757 | ,734 | ,776 | ,600/<br>,690 |
| C6.9 | -,074 | -,020 | ,591 | ,676 | ,645 | ,735 | ,620 | ,669 | ,707 | ,696 | ,621 | ,723 | ,599 | ,578 | ,687 | ,737 | ,735 | ,584/<br>,668 |

**Appendix Table 13. Correlation matrix C3 Demonstrated knowledge of healthcare environment and the organization**

|            | C3.1  | C3.2 | C3.3 | C3.4 | C3.5 | C3.6 | C3.7 | C3.8 | C3.9 | C3.10 | C3.11 |
|------------|-------|------|------|------|------|------|------|------|------|-------|-------|
| C3.1       |       |      |      |      |      |      |      |      |      |       |       |
| C3.2       | ,884  |      |      |      |      |      |      |      |      |       |       |
| C3.3       | ,890  | ,921 |      |      |      |      |      |      |      |       |       |
| C3.4       | ,723  | ,715 | ,783 |      |      |      |      |      |      |       |       |
| C3.5       | ,581  | ,626 | ,710 | ,722 |      |      |      |      |      |       |       |
| C3.6       | ,538  | ,554 | ,638 | ,669 | ,602 |      |      |      |      |       |       |
| C3.7       | ,586  | ,559 | ,619 | ,627 | ,634 | ,629 |      |      |      |       |       |
| C3.8       | ,603  | ,544 | ,603 | ,611 | ,683 | ,576 | ,815 |      |      |       |       |
| C3.9       | ,713  | ,737 | ,737 | ,810 | ,631 | ,693 | ,561 | ,628 |      |       |       |
| C3.10      | ,752  | ,813 | ,804 | ,638 | ,575 | ,631 | ,601 | ,503 | ,662 |       |       |
| C3.11      | ,769  | ,810 | ,826 | ,609 | ,655 | ,633 | ,637 | ,613 | ,614 | ,856  |       |
| Mean       | ,704  | ,716 | ,753 | ,691 | ,642 | ,616 | ,627 | ,618 | ,679 | ,684  | ,702  |
| Mean total | 0,676 |      |      |      |      |      |      |      |      |       |       |

**Appendix Table 14. Correlation scores between items of C3 and items of C1**

|      | C3.1 | C3.2 | C3.3 | C3.4 | C3.5 | C3.6 | C3.7 | C3.8 | C3.9 | C3.10 | C3.11 | Mean |
|------|------|------|------|------|------|------|------|------|------|-------|-------|------|
| C1.1 | ,488 | ,468 | ,464 | ,510 | ,454 | ,490 | ,580 | ,567 | ,504 | ,488  | ,573  | ,508 |
| C1.2 | ,534 | ,429 | ,369 | ,455 | ,369 | ,268 | ,442 | ,463 | ,411 | ,379  | ,446  | ,415 |
| C1.3 | ,558 | ,501 | ,433 | ,547 | ,487 | ,543 | ,701 | ,638 | ,546 | ,498  | ,482  | ,539 |
| C1.4 | ,415 | ,466 | ,502 | ,463 | ,415 | ,577 | ,603 | ,382 | ,399 | ,505  | ,467  | ,472 |
| C1.5 | ,500 | ,534 | ,586 | ,528 | ,536 | ,469 | ,627 | ,468 | ,470 | ,547  | ,542  | ,528 |
| C1.6 | ,603 | ,603 | ,617 | ,591 | ,591 | ,594 | ,720 | ,556 | ,601 | ,583  | ,603  | ,606 |

|       |      |      |      |      |      |      |      |      |      |      |      |      |
|-------|------|------|------|------|------|------|------|------|------|------|------|------|
| C1.7  | ,478 | ,562 | ,518 | ,421 | ,498 | ,437 | ,612 | ,482 | ,419 | ,546 | ,589 | ,506 |
| C1.8  | ,471 | ,456 | ,454 | ,398 | ,344 | ,472 | ,661 | ,501 | ,384 | ,448 | ,549 | ,467 |
| C1.9  | ,511 | ,547 | ,576 | ,553 | ,598 | ,550 | ,750 | ,601 | ,488 | ,504 | ,628 | ,573 |
| C1.10 | ,487 | ,568 | ,544 | ,536 | ,556 | ,547 | ,713 | ,591 | ,522 | ,537 | ,592 | ,563 |
| C1.11 | ,585 | ,531 | ,502 | ,491 | ,461 | ,467 | ,697 | ,586 | ,468 | ,504 | ,587 | ,534 |
| C1.12 | ,471 | ,467 | ,518 | ,500 | ,570 | ,568 | ,655 | ,625 | ,496 | ,424 | ,529 | ,529 |
| C1.13 | ,528 | ,545 | ,593 | ,603 | ,703 | ,647 | ,718 | ,686 | ,547 | ,543 | ,601 | ,610 |

*Appendix Table 15. Correlation scores between items of C3 and items of C2*

|       | C3.1 | C3.2  | C3.3 | C3.4 | C3.5 | C3.6 | C3.7  | C3.8 | C3.9 | C3.10 | C3.11 | Mean |
|-------|------|-------|------|------|------|------|-------|------|------|-------|-------|------|
| C2.1  | ,191 | ,094  | ,170 | ,320 | ,194 | ,526 | ,004  | ,184 | ,446 | ,066  | ,126  | ,211 |
| C2.2  | ,100 | -,047 | ,060 | ,168 | ,077 | ,437 | -,071 | ,178 | ,219 | -,014 | ,089  | ,109 |
| C2.3  | ,539 | ,594  | ,644 | ,602 | ,712 | ,534 | ,602  | ,538 | ,577 | ,494  | ,534  | ,579 |
| C2.4  | ,623 | ,695  | ,699 | ,628 | ,704 | ,602 | ,670  | ,592 | ,706 | ,612  | ,633  | ,651 |
| C2.5  | ,638 | ,703  | ,736 | ,579 | ,691 | ,553 | ,692  | ,622 | ,640 | ,567  | ,621  | ,640 |
| C2.6  | ,665 | ,679  | ,713 | ,639 | ,683 | ,601 | ,725  | ,672 | ,680 | ,593  | ,646  | ,663 |
| C2.7  | ,764 | ,774  | ,717 | ,608 | ,756 | ,549 | ,655  | ,634 | ,658 | ,626  | ,699  | ,676 |
| C2.8  | ,675 | ,680  | ,646 | ,533 | ,595 | ,522 | ,704  | ,583 | ,599 | ,597  | ,662  | ,618 |
| C2.9  | ,566 | ,628  | ,636 | ,640 | ,648 | ,694 | ,589  | ,479 | ,659 | ,664  | ,704  | ,628 |
| C2.10 | ,679 | ,662  | ,694 | ,659 | ,693 | ,694 | ,677  | ,610 | ,663 | ,666  | ,663  | ,669 |
| C2.11 | ,698 | ,655  | ,655 | ,662 | ,721 | ,677 | ,639  | ,671 | ,667 | ,674  | ,689  | ,673 |
| C2.12 | ,662 | ,618  | ,621 | ,498 | ,625 | ,554 | ,731  | ,641 | ,554 | ,593  | ,700  | ,618 |
| C2.13 | ,607 | ,581  | ,554 | ,617 | ,554 | ,521 | ,485  | ,442 | ,600 | ,521  | ,606  | ,553 |
| C2.14 | ,536 | ,563  | ,540 | ,606 | ,459 | ,448 | ,514  | ,487 | ,580 | ,453  | ,600  | ,526 |
| C2.15 | ,569 | ,623  | ,700 | ,691 | ,720 | ,622 | ,738  | ,668 | ,585 | ,618  | ,714  | ,659 |
| C2.16 | ,586 | ,558  | ,582 | ,600 | ,593 | ,721 | ,839  | ,703 | ,534 | ,603  | ,635  | ,632 |
| C2.17 | ,656 | ,680  | ,682 | ,575 | ,570 | ,552 | ,744  | ,644 | ,591 | ,547  | ,712  | ,632 |

*Appendix Table 16. Correlation scores between items of C3 and items of C4*

|      | C3.1 | C3.2 | C3.3 | C3.4 | C3.5 | C3.6 | C3.7 | C3.8 | C3.9 | C3.10 | C3.11 | Mean |
|------|------|------|------|------|------|------|------|------|------|-------|-------|------|
| C4.1 | ,612 | ,523 | ,551 | ,700 | ,436 | ,456 | ,485 | ,512 | ,678 | ,430  | ,477  | ,533 |
| C4.2 | ,506 | ,497 | ,524 | ,616 | ,462 | ,540 | ,399 | ,457 | ,658 | ,408  | ,454  | ,502 |



|       |      |      |      |      |      |      |      |      |      |      |      |      |
|-------|------|------|------|------|------|------|------|------|------|------|------|------|
| C4.3  | ,482 | ,448 | ,465 | ,545 | ,425 | ,504 | ,390 | ,457 | ,603 | ,357 | ,485 | ,469 |
| C4.4  | ,504 | ,540 | ,570 | ,530 | ,523 | ,361 | ,507 | ,484 | ,538 | ,434 | ,546 | ,503 |
| C4.5  | ,432 | ,378 | ,471 | ,359 | ,479 | ,398 | ,570 | ,558 | ,384 | ,317 | ,445 | ,436 |
| C4.6  | ,533 | ,496 | ,565 | ,531 | ,677 | ,523 | ,599 | ,553 | ,447 | ,473 | ,501 | ,536 |
| C4.7  | ,562 | ,510 | ,527 | ,514 | ,454 | ,441 | ,618 | ,544 | ,468 | ,481 | ,459 | ,507 |
| C4.8  | ,499 | ,484 | ,547 | ,452 | ,467 | ,440 | ,585 | ,541 | ,473 | ,427 | ,546 | ,496 |
| C4.9  | ,449 | ,469 | ,467 | ,495 | ,332 | ,241 | ,520 | ,459 | ,395 | ,330 | ,381 | ,413 |
| C4.10 | ,554 | ,554 | ,600 | ,567 | ,547 | ,423 | ,596 | ,574 | ,540 | ,469 | ,626 | ,550 |
| C4.11 | ,476 | ,443 | ,514 | ,517 | ,498 | ,383 | ,617 | ,538 | ,460 | ,409 | ,557 | ,492 |
| C4.12 | ,519 | ,521 | ,592 | ,528 | ,530 | ,418 | ,622 | ,580 | ,457 | ,494 | ,571 | ,530 |
| C4.13 | ,572 | ,562 | ,577 | ,566 | ,573 | ,404 | ,671 | ,634 | ,530 | ,486 | ,500 | ,552 |
| C4.14 | ,577 | ,539 | ,569 | ,534 | ,639 | ,526 | ,594 | ,636 | ,597 | ,429 | ,542 | ,562 |
| C4.15 | ,491 | ,492 | ,529 | ,550 | ,446 | ,439 | ,611 | ,572 | ,516 | ,410 | ,422 | ,498 |
| C4.16 | ,519 | ,661 | ,644 | ,553 | ,511 | ,444 | ,453 | ,350 | ,639 | ,494 | ,540 | ,528 |
| C4.17 | ,414 | ,443 | ,458 | ,427 | ,524 | ,447 | ,417 | ,455 | ,439 | ,322 | ,497 | ,440 |

*Appendix Table 17. Correlation scores between items of C3 and items of C5*

|       | C3.1 | C3.2 | C3.3 | C3.4 | C3.5 | C3.6 | C3.7 | C3.8 | C3.9 | C3.10 | C3.11 | Mean |
|-------|------|------|------|------|------|------|------|------|------|-------|-------|------|
| C5.1  | ,673 | ,699 | ,727 | ,615 | ,621 | ,554 | ,647 | ,632 | ,631 | ,634  | ,725  | ,651 |
| C5.2  | ,628 | ,678 | ,700 | ,644 | ,577 | ,576 | ,631 | ,597 | ,709 | ,648  | ,696  | ,644 |
| C5.3  | ,652 | ,645 | ,666 | ,596 | ,519 | ,511 | ,671 | ,507 | ,578 | ,634  | ,691  | ,606 |
| C5.4  | ,660 | ,714 | ,709 | ,659 | ,650 | ,530 | ,706 | ,618 | ,652 | ,606  | ,695  | ,654 |
| C5.5  | ,525 | ,594 | ,655 | ,651 | ,604 | ,602 | ,656 | ,539 | ,579 | ,640  | ,699  | ,613 |
| C5.6  | ,552 | ,545 | ,573 | ,577 | ,571 | ,447 | ,766 | ,657 | ,440 | ,485  | ,581  | ,563 |
| C5.7  | ,573 | ,587 | ,642 | ,532 | ,545 | ,428 | ,698 | ,594 | ,454 | ,512  | ,597  | ,560 |
| C5.8  | ,537 | ,601 | ,619 | ,574 | ,512 | ,411 | ,639 | ,592 | ,569 | ,520  | ,558  | ,557 |
| C5.9  | ,558 | ,641 | ,686 | ,555 | ,564 | ,588 | ,678 | ,555 | ,517 | ,647  | ,707  | ,609 |
| C5.10 | ,611 | ,615 | ,605 | ,505 | ,541 | ,507 | ,535 | ,524 | ,628 | ,508  | ,612  | ,563 |
| C5.11 | ,430 | ,426 | ,468 | ,399 | ,490 | ,382 | ,627 | ,518 | ,453 | ,382  | ,527  | ,464 |
| C5.12 | ,532 | ,518 | ,558 | ,542 | ,570 | ,456 | ,591 | ,469 | ,496 | ,462  | ,560  | ,523 |
| C5.13 | ,511 | ,442 | ,491 | ,435 | ,388 | ,337 | ,548 | ,450 | ,417 | ,411  | ,396  | ,439 |

Appendix Table 18. Correlation scores between items of C3 and items of C6

|      | C3.1 | C3.2 | C3.3 | C3.4 | C3.5 | C3.6 | C3.7 | C3.8 | C3.9 | C3.10 | C3.11 | Mean |
|------|------|------|------|------|------|------|------|------|------|-------|-------|------|
| C6.1 | ,648 | ,707 | ,736 | ,765 | ,721 | ,673 | ,734 | ,655 | ,682 | ,705  | ,765  | ,708 |
| C6.2 | ,677 | ,661 | ,721 | ,639 | ,708 | ,628 | ,689 | ,603 | ,572 | ,622  | ,761  | ,662 |
| C6.3 | ,677 | ,643 | ,730 | ,733 | ,580 | ,634 | ,722 | ,622 | ,661 | ,631  | ,677  | ,665 |
| C6.4 | ,563 | ,552 | ,611 | ,595 | ,580 | ,582 | ,592 | ,512 | ,588 | ,548  | ,642  | ,579 |
| C6.5 | ,576 | ,581 | ,668 | ,573 | ,711 | ,614 | ,692 | ,602 | ,517 | ,658  | ,657  | ,623 |
| C6.6 | ,626 | ,638 | ,693 | ,586 | ,696 | ,625 | ,690 | ,627 | ,624 | ,576  | ,699  | ,644 |
| C6.7 | ,587 | ,582 | ,638 | ,633 | ,654 | ,607 | ,727 | ,588 | ,564 | ,573  | ,679  | ,621 |
| C6.8 | ,524 | ,516 | ,613 | ,566 | ,575 | ,538 | ,796 | ,615 | ,485 | ,511  | ,635  | ,579 |
| C6.9 | ,561 | ,554 | ,610 | ,596 | ,536 | ,503 | ,768 | ,633 | ,549 | ,575  | ,621  | ,591 |

Appendix Table 19. Correlation matrix C4 Interpersonal. Communication qualities and relationship management

[illegible]

*Appendix Table 20. Correlation scores between items of C4 and items of C1*

|       | C4.1 | C4.2 | C4.3 | C4.4 | C4.5 | C4.6 | C4.7 | C4.8 | C4.9 | C4.10 | C4.11 | C4.12 | C4.13 | C4.14 | C4.15 | C4.16 | C4.17 | Mean |
|-------|------|------|------|------|------|------|------|------|------|-------|-------|-------|-------|-------|-------|-------|-------|------|
| C1.1  | ,393 | ,360 | ,446 | ,448 | ,493 | ,374 | ,279 | ,462 | ,408 | ,484  | ,454  | ,365  | ,474  | ,387  | ,446  | ,439  | ,339  | ,415 |
| C1.2  | ,438 | ,312 | ,358 | ,346 | ,350 | ,368 | ,233 | ,258 | ,334 | ,321  | ,405  | ,196  | ,425  | ,313  | ,417  | ,329  | ,249  | ,332 |
| C1.3  | ,477 | ,427 | ,363 | ,417 | ,407 | ,459 | ,465 | ,406 | ,367 | ,471  | ,395  | ,379  | ,601  | ,446  | ,484  | ,435  | ,225  | ,425 |
| C1.4  | ,260 | ,258 | ,236 | ,329 | ,438 | ,413 | ,317 | ,374 | ,412 | ,400  | ,403  | ,343  | ,442  | ,259  | ,400  | ,376  | ,160  | ,342 |
| C1.5  | ,418 | ,346 | ,330 | ,482 | ,533 | ,477 | ,357 | ,490 | ,530 | ,589  | ,590  | ,469  | ,497  | ,354  | ,408  | ,477  | ,317  | ,451 |
| C1.6  | ,458 | ,370 | ,419 | ,498 | ,518 | ,425 | ,379 | ,481 | ,447 | ,528  | ,475  | ,419  | ,481  | ,329  | ,310  | ,429  | ,288  | ,427 |
| C1.7  | ,325 | ,315 | ,373 | ,454 | ,591 | ,515 | ,308 | ,511 | ,471 | ,553  | ,496  | ,488  | ,472  | ,306  | ,386  | ,445  | ,316  | ,431 |
| C1.8  | ,339 | ,257 | ,341 | ,406 | ,438 | ,365 | ,394 | ,496 | ,552 | ,519  | ,508  | ,478  | ,441  | ,356  | ,432  | ,493  | ,265  | ,416 |
| C1.9  | ,415 | ,338 | ,399 | ,540 | ,607 | ,445 | ,408 | ,529 | ,547 | ,596  | ,637  | ,519  | ,572  | ,466  | ,504  | ,523  | ,360  | ,494 |
| C1.10 | ,399 | ,368 | ,408 | ,534 | ,562 | ,495 | ,422 | ,545 | ,580 | ,561  | ,565  | ,484  | ,551  | ,431  | ,481  | ,509  | ,337  | ,484 |
| C1.11 | ,459 | ,350 | ,393 | ,478 | ,479 | ,464 | ,535 | ,501 | ,542 | ,499  | ,488  | ,516  | ,599  | ,476  | ,477  | ,430  | ,253  | ,467 |
| C1.12 | ,393 | ,332 | ,347 | ,431 | ,578 | ,477 | ,278 | ,455 | ,420 | ,529  | ,542  | ,412  | ,548  | ,439  | ,329  | ,414  | ,323  | ,426 |
| C1.13 | ,424 | ,411 | ,377 | ,472 | ,566 | ,649 | ,380 | ,560 | ,399 | ,607  | ,574  | ,501  | ,627  | ,656  | ,567  | ,454  | ,526  | ,515 |

*Appendix Table 21. Correlation scores between items of C4 and items of C2*

|       | C4.1 | C4.2 | C4.3 | C4.4      | C4.5 | C4.6      | C4.7      | C4.8      | C4.9      | C4.10 | C4.11 | C4.12 | C4.13 | C4.14 | C4.15 | C4.16 | C4.17 | Mean  |
|-------|------|------|------|-----------|------|-----------|-----------|-----------|-----------|-------|-------|-------|-------|-------|-------|-------|-------|-------|
| C2.1  | ,181 | ,461 | ,448 | ,096      | ,142 | ,116      | ,049      | ,062      | -<br>,161 | ,026  | -,062 | -,032 | ,009  | ,050  | ,137  | -,080 | ,043  | ,087  |
| C2.2  | ,025 | ,276 | ,243 | -<br>,088 | ,086 | -<br>,005 | -<br>,129 | -<br>,113 | -<br>,242 | -,146 | -,127 | -,181 | -,123 | -,122 | ,093  | -,195 | -,095 | -,050 |
| C2.3  | ,318 | ,237 | ,212 | ,336      | ,408 | ,437      | ,339      | ,310      | ,310      | ,362  | ,440  | ,264  | ,372  | ,453  | ,468  | ,497  | ,267  | ,355  |
| C2.4  | ,392 | ,330 | ,329 | ,412      | ,456 | ,485      | ,385      | ,398      | ,398      | ,476  | ,524  | ,334  | ,464  | ,535  | ,544  | ,622  | ,391  | ,440  |
| C2.5  | ,405 | ,352 | ,337 | ,495      | ,511 | ,510      | ,501      | ,453      | ,423      | ,469  | ,521  | ,407  | ,524  | ,572  | ,540  | ,598  | ,409  | ,472  |
| C2.6  | ,472 | ,376 | ,389 | ,511      | ,548 | ,516      | ,501      | ,466      | ,482      | ,541  | ,563  | ,442  | ,571  | ,605  | ,598  | ,597  | ,427  | ,506  |
| C2.7  | ,398 | ,325 | ,402 | ,509      | ,538 | ,546      | ,500      | ,450      | ,428      | ,499  | ,492  | ,397  | ,586  | ,608  | ,512  | ,552  | ,480  | ,484  |
| C2.8  | ,321 | ,234 | ,324 | ,428      | ,548 | ,459      | ,417      | ,454      | ,377      | ,533  | ,508  | ,380  | ,568  | ,448  | ,417  | ,557  | ,385  | ,433  |
| C2.9  | ,522 | ,457 | ,452 | ,517      | ,436 | ,506      | ,469      | ,541      | ,375      | ,608  | ,506  | ,539  | ,487  | ,578  | ,470  | ,514  | ,483  | ,498  |
| C2.10 | ,492 | ,424 | ,374 | ,458      | ,422 | ,577      | ,542      | ,530      | ,330      | ,555  | ,449  | ,513  | ,558  | ,670  | ,523  | ,450  | ,485  | ,491  |
| C2.11 | ,574 | ,472 | ,454 | ,435      | ,392 | ,618      | ,513      | ,510      | ,329      | ,539  | ,458  | ,491  | ,606  | ,689  | ,530  | ,451  | ,509  | ,504  |
| C2.12 | ,420 | ,280 | ,308 | ,449      | ,473 | ,470      | ,450      | ,480      | ,377      | ,558  | ,595  | ,441  | ,548  | ,683  | ,503  | ,431  | ,485  | ,468  |
| C2.13 | ,466 | ,543 | ,572 | ,567      | ,351 | ,450      | ,487      | ,410      | ,329      | ,507  | ,455  | ,420  | ,606  | ,723  | ,633  | ,587  | ,610  | ,513  |
| C2.14 | ,677 | ,637 | ,682 | ,682      | ,553 | ,410      | ,490      | ,678      | ,543      | ,791  | ,614  | ,593  | ,571  | ,582  | ,487  | ,519  | ,554  | ,592  |
| C2.15 | ,468 | ,402 | ,408 | ,555      | ,505 | ,567      | ,523      | ,552      | ,318      | ,611  | ,462  | ,537  | ,625  | ,597  | ,506  | ,523  | ,470  | ,508  |
| C2.16 | ,378 | ,321 | ,326 | ,355      | ,451 | ,538      | ,546      | ,454      | ,327      | ,474  | ,463  | ,442  | ,505  | ,606  | ,645  | ,460  | ,409  | ,453  |
| C2.17 | ,371 | ,263 | ,371 | ,448      | ,585 | ,420      | ,347      | ,465      | ,436      | ,579  | ,620  | ,391  | ,482  | ,551  | ,602  | ,586  | ,483  | ,471  |

*Appendix Table 22. Correlation scores between items of C4 and items of C3*

|       | C4.1 | C4.2 | C4.3 | C4.4 | C4.5 | C4.6 | C4.7 | C4.8 | C4.9 | C4.10 | C4.11 | C4.12 | C4.13 | C4.14 | C4.15 | C4.16 | C4.17 | Mean |
|-------|------|------|------|------|------|------|------|------|------|-------|-------|-------|-------|-------|-------|-------|-------|------|
| C3.1  | ,612 | ,506 | ,482 | ,504 | ,432 | ,533 | ,562 | ,499 | ,449 | ,554  | ,476  | ,519  | ,572  | ,577  | ,491  | ,519  | ,414  | ,512 |
| C3.2  | ,523 | ,497 | ,448 | ,540 | ,378 | ,496 | ,510 | ,484 | ,469 | ,554  | ,443  | ,521  | ,562  | ,539  | ,492  | ,661  | ,443  | ,504 |
| C3.3  | ,551 | ,524 | ,465 | ,570 | ,471 | ,565 | ,527 | ,547 | ,467 | ,600  | ,514  | ,592  | ,577  | ,569  | ,529  | ,644  | ,458  | ,539 |
| C3.4  | ,700 | ,616 | ,545 | ,530 | ,359 | ,531 | ,514 | ,452 | ,495 | ,567  | ,517  | ,528  | ,566  | ,534  | ,550  | ,553  | ,427  | ,528 |
| C3.5  | ,436 | ,462 | ,425 | ,523 | ,479 | ,677 | ,454 | ,467 | ,332 | ,547  | ,498  | ,530  | ,573  | ,639  | ,446  | ,511  | ,524  | ,501 |
| C3.6  | ,456 | ,540 | ,504 | ,361 | ,398 | ,523 | ,441 | ,440 | ,241 | ,423  | ,383  | ,418  | ,404  | ,526  | ,439  | ,444  | ,447  | ,435 |
| C3.7  | ,485 | ,399 | ,390 | ,507 | ,570 | ,599 | ,618 | ,585 | ,520 | ,596  | ,617  | ,622  | ,671  | ,594  | ,611  | ,453  | ,417  | ,544 |
| C3.8  | ,512 | ,457 | ,457 | ,484 | ,558 | ,553 | ,544 | ,541 | ,459 | ,574  | ,538  | ,580  | ,634  | ,636  | ,572  | ,350  | ,455  | ,524 |
| C3.9  | ,678 | ,658 | ,603 | ,538 | ,384 | ,447 | ,468 | ,473 | ,395 | ,540  | ,460  | ,457  | ,530  | ,597  | ,516  | ,639  | ,439  | ,519 |
| C3.10 | ,430 | ,408 | ,357 | ,434 | ,317 | ,473 | ,481 | ,427 | ,330 | ,469  | ,409  | ,494  | ,486  | ,429  | ,410  | ,494  | ,322  | ,422 |
| C3.11 | ,477 | ,454 | ,485 | ,546 | ,445 | ,501 | ,459 | ,546 | ,381 | ,626  | ,557  | ,571  | ,500  | ,542  | ,422  | ,540  | ,497  | ,503 |

*Appendix Table 23. Correlation scores between items of C4 and items of C5*

|       | C4.1 | C4.2 | C4.3 | C4.4 | C4.5 | C4.6 | C4.7 | C4.8 | C4.9 | C4.10 | C4.11 | C4.12 | C4.13 | C4.14 | C4.15 | C4.16 | C4.17 | Mean |
|-------|------|------|------|------|------|------|------|------|------|-------|-------|-------|-------|-------|-------|-------|-------|------|
| C5.1  | ,474 | ,489 | ,463 | ,605 | ,443 | ,441 | ,473 | ,591 | ,405 | ,721  | ,531  | ,546  | ,656  | ,721  | ,540  | ,672  | ,553  | ,548 |
| C5.2  | ,547 | ,584 | ,577 | ,678 | ,489 | ,528 | ,578 | ,632 | ,510 | ,737  | ,624  | ,623  | ,630  | ,711  | ,593  | ,704  | ,604  | ,609 |
| C5.3  | ,518 | ,567 | ,593 | ,729 | ,402 | ,442 | ,612 | ,577 | ,536 | ,656  | ,575  | ,689  | ,560  | ,591  | ,502  | ,620  | ,511  | ,569 |
| C5.4  | ,508 | ,519 | ,550 | ,661 | ,503 | ,476 | ,541 | ,622 | ,496 | ,743  | ,588  | ,625  | ,532  | ,664  | ,562  | ,671  | ,551  | ,577 |
| C5.5  | ,511 | ,549 | ,571 | ,679 | ,494 | ,569 | ,587 | ,612 | ,519 | ,671  | ,604  | ,656  | ,601  | ,657  | ,520  | ,650  | ,617  | ,592 |
| C5.6  | ,512 | ,477 | ,530 | ,625 | ,586 | ,541 | ,569 | ,649 | ,631 | ,691  | ,649  | ,628  | ,712  | ,708  | ,619  | ,564  | ,611  | ,606 |
| C5.7  | ,492 | ,470 | ,480 | ,560 | ,597 | ,538 | ,492 | ,578 | ,596 | ,603  | ,663  | ,581  | ,642  | ,542  | ,526  | ,461  | ,488  | ,548 |
| C5.8  | ,491 | ,514 | ,498 | ,554 | ,449 | ,405 | ,477 | ,499 | ,649 | ,581  | ,658  | ,605  | ,453  | ,572  | ,604  | ,571  | ,522  | ,535 |
| C5.9  | ,390 | ,388 | ,411 | ,546 | ,299 | ,358 | ,484 | ,463 | ,427 | ,577  | ,454  | ,651  | ,512  | ,556  | ,388  | ,624  | ,450  | ,469 |
| C5.10 | ,554 | ,506 | ,550 | ,633 | ,560 | ,499 | ,540 | ,697 | ,534 | ,775  | ,649  | ,631  | ,500  | ,755  | ,484  | ,648  | ,639  | ,597 |
| C5.11 | ,460 | ,432 | ,499 | ,559 | ,652 | ,446 | ,423 | ,662 | ,572 | ,733  | ,808  | ,538  | ,481  | ,653  | ,509  | ,489  | ,621  | ,561 |
| C5.12 | ,533 | ,563 | ,609 | ,706 | ,515 | ,558 | ,585 | ,618 | ,506 | ,687  | ,634  | ,623  | ,644  | ,744  | ,529  | ,666  | ,674  | ,611 |
| C5.13 | ,395 | ,313 | ,252 | ,397 | ,416 | ,331 | ,502 | ,361 | ,547 | ,417  | ,511  | ,411  | ,459  | ,479  | ,576  | ,549  | ,195  | ,418 |

*Appendix Table 24. Correlation scores between items of C4 and items of C6*

|      | C4.1 | C4.2 | C4.3 | C4.4 | C4.5 | C4.6 | C4.7 | C4.8 | C4.9 | C4.10 | C4.11 | C4.12 | C4.13 | C4.14 | C4.15 | C4.16 | C4.17 | Mean |
|------|------|------|------|------|------|------|------|------|------|-------|-------|-------|-------|-------|-------|-------|-------|------|
| C6.1 | ,571 | ,534 | ,515 | ,582 | ,519 | ,640 | ,585 | ,638 | ,456 | ,741  | ,622  | ,579  | ,561  | ,686  | ,565  | ,616  | ,566  | ,587 |
| C6.2 | ,410 | ,336 | ,406 | ,509 | ,490 | ,572 | ,464 | ,537 | ,365 | ,615  | ,509  | ,495  | ,521  | ,611  | ,395  | ,534  | ,545  | ,489 |
| C6.3 | ,615 | ,522 | ,560 | ,605 | ,547 | ,591 | ,629 | ,645 | ,533 | ,700  | ,608  | ,612  | ,587  | ,663  | ,610  | ,624  | ,528  | ,599 |
| C6.4 | ,445 | ,347 | ,450 | ,524 | ,460 | ,512 | ,540 | ,584 | ,429 | ,676  | ,550  | ,481  | ,471  | ,623  | ,434  | ,624  | ,564  | ,513 |
| C6.5 | ,384 | ,286 | ,320 | ,494 | ,467 | ,503 | ,548 | ,505 | ,329 | ,550  | ,436  | ,606  | ,505  | ,597  | ,421  | ,491  | ,427  | ,463 |
| C6.6 | ,457 | ,426 | ,511 | ,617 | ,593 | ,567 | ,553 | ,618 | ,413 | ,670  | ,545  | ,590  | ,626  | ,714  | ,467  | ,634  | ,613  | ,566 |
| C6.7 | ,422 | ,404 | ,421 | ,601 | ,437 | ,522 | ,532 | ,489 | ,368 | ,616  | ,498  | ,536  | ,611  | ,695  | ,549  | ,598  | ,509  | ,518 |
| C6.8 | ,386 | ,320 | ,352 | ,575 | ,553 | ,481 | ,505 | ,532 | ,516 | ,604  | ,623  | ,576  | ,528  | ,601  | ,611  | ,542  | ,453  | ,515 |
| C6.9 | ,404 | ,353 | ,363 | ,556 | ,468 | ,424 | ,497 | ,445 | ,513 | ,557  | ,553  | ,586  | ,541  | ,603  | ,692  | ,553  | ,397  | ,500 |

Appendix Table 25. Correlation matrix C5 Leading people and organisation

|            | C5.1 | C5.2 | C5.3 | C5.4 | C5.5 | C5.6 | C5.7 | C5.8 | C5.9 | C5.10 | C5.11 | C5.12 | C5.13 |
|------------|------|------|------|------|------|------|------|------|------|-------|-------|-------|-------|
| C5.1       |      |      |      |      |      |      |      |      |      |       |       |       |       |
| C5.2       | ,882 |      |      |      |      |      |      |      |      |       |       |       |       |
| C5.3       | ,779 | ,861 |      |      |      |      |      |      |      |       |       |       |       |
| C5.4       | ,814 | ,832 | ,846 |      |      |      |      |      |      |       |       |       |       |
| C5.5       | ,749 | ,859 | ,851 | ,778 |      |      |      |      |      |       |       |       |       |
| C5.6       | ,770 | ,718 | ,756 | ,761 | ,830 |      |      |      |      |       |       |       |       |
| C5.7       | ,661 | ,712 | ,731 | ,637 | ,747 | ,833 |      |      |      |       |       |       |       |
| C5.8       | ,709 | ,752 | ,774 | ,754 | ,726 | ,770 | ,839 |      |      |       |       |       |       |
| C5.9       | ,748 | ,726 | ,839 | ,759 | ,786 | ,741 | ,717 | ,758 |      |       |       |       |       |
| C5.10      | ,787 | ,825 | ,712 | ,744 | ,680 | ,645 | ,610 | ,664 | ,638 |       |       |       |       |
| C5.11      | ,668 | ,686 | ,655 | ,659 | ,645 | ,728 | ,702 | ,668 | ,553 | ,792  |       |       |       |
| C5.12      | ,729 | ,753 | ,787 | ,738 | ,795 | ,812 | ,679 | ,607 | ,672 | ,764  | ,791  |       |       |
| C5.13      | ,623 | ,543 | ,533 | ,520 | ,481 | ,633 | ,576 | ,576 | ,487 | ,592  | ,538  | ,623  |       |
| Mean       | ,743 | ,762 | ,760 | ,737 | ,744 | ,750 | ,704 | ,716 | ,702 | ,704  | ,674  | ,729  | ,560  |
| Mean total | ,714 |      |      |      |      |      |      |      |      |       |       |       |       |

Appendix Table 26. Correlation scores between items of C5 and items of C1

|       | C5.1 | C5.2 | C5.3 | C5.4 | C5.5 | C5.6 | C5.7 | C5.8 | C5.9 | C5.10 | C5.11 | C5.12 | C5.13 | Mean |
|-------|------|------|------|------|------|------|------|------|------|-------|-------|-------|-------|------|
| C1.1  | ,546 | ,529 | ,540 | ,486 | ,527 | ,578 | ,559 | ,464 | ,503 | ,491  | ,461  | ,416  | ,417  | ,501 |
| C1.2  | ,391 | ,447 | ,435 | ,333 | ,427 | ,481 | ,546 | ,382 | ,274 | ,404  | ,394  | ,423  | ,398  | ,410 |
| C1.3  | ,585 | ,542 | ,535 | ,565 | ,523 | ,603 | ,516 | ,433 | ,483 | ,512  | ,411  | ,456  | ,543  | ,516 |
| C1.4  | ,426 | ,451 | ,447 | ,413 | ,505 | ,468 | ,486 | ,376 | ,514 | ,369  | ,359  | ,327  | ,391  | ,426 |
| C1.5  | ,560 | ,581 | ,578 | ,506 | ,617 | ,611 | ,663 | ,557 | ,603 | ,536  | ,585  | ,537  | ,498  | ,572 |
| C1.6  | ,519 | ,501 | ,622 | ,608 | ,564 | ,597 | ,636 | ,510 | ,603 | ,485  | ,538  | ,503  | ,406  | ,546 |
| C1.7  | ,513 | ,517 | ,539 | ,553 | ,478 | ,551 | ,642 | ,559 | ,565 | ,523  | ,494  | ,436  | ,427  | ,523 |
| C1.8  | ,512 | ,495 | ,554 | ,573 | ,506 | ,575 | ,526 | ,473 | ,594 | ,502  | ,409  | ,410  | ,535  | ,513 |
| C1.9  | ,622 | ,614 | ,667 | ,648 | ,651 | ,693 | ,682 | ,603 | ,665 | ,613  | ,599  | ,546  | ,551  | ,627 |
| C1.10 | ,598 | ,606 | ,631 | ,638 | ,658 | ,673 | ,647 | ,593 | ,598 | ,579  | ,529  | ,475  | ,503  | ,594 |
| C1.11 | ,578 | ,514 | ,589 | ,552 | ,514 | ,638 | ,616 | ,515 | ,602 | ,568  | ,460  | ,466  | ,609  | ,555 |
| C1.12 | ,603 | ,534 | ,496 | ,515 | ,577 | ,636 | ,622 | ,477 | ,560 | ,526  | ,599  | ,549  | ,482  | ,552 |
| C1.13 | ,696 | ,653 | ,541 | ,630 | ,689 | ,717 | ,634 | ,570 | ,600 | ,617  | ,582  | ,606  | ,493  | ,618 |

*Appendix Table 27. Correlation scores between items of C5 and items of C2*

|       | C5.1  | C5.2  | C5.3  | C5.4  | C5.5  | C5.6  | C5.7  | C5.8  | C5.9  | C5.10 | C5.11 | C5.12 | C5.13 | Mean  |
|-------|-------|-------|-------|-------|-------|-------|-------|-------|-------|-------|-------|-------|-------|-------|
| C2.1  | ,004  | ,112  | -,015 | ,122  | ,055  | -,157 | -,070 | -,077 | -,091 | ,022  | -,156 | ,008  | ,532  | ,022  |
| C2.2  | -,096 | -,068 | -,136 | -,028 | -,073 | -,195 | -,080 | -,132 | -,196 | -,123 | -,174 | -,100 | -,060 | -,112 |
| C2.3  | ,545  | ,567  | ,520  | ,573  | ,541  | ,518  | ,615  | ,542  | ,495  | ,550  | ,493  | ,451  | ,548  | ,535  |
| C2.4  | ,669  | ,707  | ,611  | ,668  | ,611  | ,586  | ,692  | ,653  | ,558  | ,656  | ,587  | ,546  | ,581  | ,625  |
| C2.5  | ,713  | ,685  | ,645  | ,656  | ,596  | ,616  | ,723  | ,651  | ,586  | ,650  | ,609  | ,597  | ,645  | ,644  |
| C2.6  | ,743  | ,755  | ,673  | ,676  | ,652  | ,672  | ,751  | ,667  | ,602  | ,702  | ,618  | ,609  | ,681  | ,677  |
| C2.7  | ,627  | ,661  | ,589  | ,624  | ,635  | ,603  | ,655  | ,572  | ,555  | ,642  | ,527  | ,572  | ,521  | ,598  |
| C2.8  | ,602  | ,647  | ,575  | ,647  | ,593  | ,573  | ,613  | ,548  | ,515  | ,585  | ,550  | ,528  | ,409  | ,568  |
| C2.9  | ,655  | ,655  | ,577  | ,591  | ,593  | ,492  | ,528  | ,534  | ,613  | ,694  | ,469  | ,493  | ,466  | ,566  |
| C2.10 | ,698  | ,646  | ,560  | ,601  | ,595  | ,580  | ,603  | ,562  | ,603  | ,657  | ,445  | ,509  | ,525  | ,583  |
| C2.11 | ,645  | ,624  | ,544  | ,600  | ,593  | ,575  | ,576  | ,530  | ,565  | ,650  | ,424  | ,496  | ,470  | ,561  |
| C2.12 | ,681  | ,661  | ,572  | ,570  | ,602  | ,640  | ,692  | ,594  | ,584  | ,709  | ,656  | ,648  | ,582  | ,630  |
| C2.13 | ,667  | ,697  | ,635  | ,610  | ,642  | ,579  | ,488  | ,483  | ,495  | ,581  | ,447  | ,712  | ,500  | ,580  |
| C2.14 | ,674  | ,676  | ,633  | ,729  | ,579  | ,597  | ,553  | ,586  | ,553  | ,699  | ,599  | ,577  | ,413  | ,605  |
| C2.15 | ,691  | ,664  | ,645  | ,740  | ,735  | ,693  | ,606  | ,496  | ,642  | ,582  | ,552  | ,643  | ,411  | ,623  |
| C2.16 | ,636  | ,610  | ,627  | ,708  | ,658  | ,683  | ,567  | ,534  | ,638  | ,543  | ,536  | ,550  | ,481  | ,598  |
| C2.17 | ,640  | ,647  | ,586  | ,716  | ,597  | ,630  | ,601  | ,574  | ,581  | ,603  | ,649  | ,592  | ,476  | ,607  |

*Appendix Table 28. Correlation scores between items of C5 and items of C3*

|       | C5.1 | C5.2 | C5.3 | C5.4 | C5.5 | C5.6 | C5.7 | C5.8 | C5.9 | C5.10 | C5.11 | C5.12 | C5.13 | Mean |
|-------|------|------|------|------|------|------|------|------|------|-------|-------|-------|-------|------|
| C3.1  | ,673 | ,628 | ,652 | ,660 | ,525 | ,552 | ,573 | ,537 | ,558 | ,611  | ,430  | ,532  | ,511  | ,572 |
| C3.2  | ,699 | ,678 | ,645 | ,714 | ,594 | ,545 | ,587 | ,601 | ,641 | ,615  | ,426  | ,518  | ,442  | ,593 |
| C3.3  | ,727 | ,700 | ,666 | ,709 | ,655 | ,573 | ,642 | ,619 | ,686 | ,605  | ,468  | ,558  | ,491  | ,623 |
| C3.4  | ,615 | ,644 | ,596 | ,659 | ,651 | ,577 | ,532 | ,574 | ,555 | ,505  | ,399  | ,542  | ,435  | ,560 |
| C3.5  | ,621 | ,577 | ,519 | ,650 | ,604 | ,571 | ,545 | ,512 | ,564 | ,541  | ,490  | ,570  | ,388  | ,550 |
| C3.6  | ,554 | ,576 | ,511 | ,530 | ,602 | ,447 | ,428 | ,411 | ,588 | ,507  | ,382  | ,456  | ,337  | ,487 |
| C3.7  | ,647 | ,631 | ,671 | ,706 | ,656 | ,766 | ,698 | ,639 | ,678 | ,535  | ,627  | ,591  | ,548  | ,646 |
| C3.8  | ,632 | ,597 | ,507 | ,618 | ,539 | ,657 | ,594 | ,592 | ,555 | ,524  | ,518  | ,469  | ,450  | ,558 |
| C3.9  | ,631 | ,709 | ,578 | ,652 | ,579 | ,440 | ,454 | ,569 | ,517 | ,628  | ,453  | ,496  | ,417  | ,548 |
| C3.10 | ,634 | ,648 | ,634 | ,606 | ,640 | ,485 | ,512 | ,520 | ,647 | ,508  | ,382  | ,462  | ,411  | ,545 |
| C3.11 | ,725 | ,696 | ,691 | ,695 | ,699 | ,581 | ,597 | ,558 | ,707 | ,612  | ,527  | ,560  | ,396  | ,619 |

*Appendix Table 29. Correlation scores between items of C5 and items of C4*

|       | C5.1 | C5.2 | C5.3 | C5.4 | C5.5 | C5.6 | C5.7 | C5.8 | C5.9 | C5.10 | C5.11 | C5.12 | C5.13 | Mean |
|-------|------|------|------|------|------|------|------|------|------|-------|-------|-------|-------|------|
| C4.1  | ,474 | ,547 | ,518 | ,508 | ,511 | ,512 | ,492 | ,491 | ,390 | ,554  | ,460  | ,533  | ,395  | ,491 |
| C4.2  | ,489 | ,584 | ,567 | ,519 | ,549 | ,477 | ,470 | ,514 | ,388 | ,506  | ,432  | ,563  | ,313  | ,490 |
| C4.3  | ,463 | ,577 | ,593 | ,550 | ,571 | ,530 | ,480 | ,498 | ,411 | ,550  | ,499  | ,609  | ,252  | ,506 |
| C4.4  | ,605 | ,678 | ,729 | ,661 | ,679 | ,625 | ,560 | ,554 | ,546 | ,633  | ,559  | ,706  | ,397  | ,610 |
| C4.5  | ,443 | ,489 | ,402 | ,503 | ,494 | ,586 | ,597 | ,449 | ,299 | ,560  | ,652  | ,515  | ,416  | ,493 |
| C4.6  | ,441 | ,528 | ,442 | ,476 | ,569 | ,541 | ,538 | ,405 | ,358 | ,499  | ,446  | ,558  | ,331  | ,472 |
| C4.7  | ,473 | ,578 | ,612 | ,541 | ,587 | ,569 | ,492 | ,477 | ,484 | ,540  | ,423  | ,585  | ,502  | ,528 |
| C4.8  | ,591 | ,632 | ,577 | ,622 | ,612 | ,649 | ,578 | ,499 | ,463 | ,697  | ,662  | ,618  | ,361  | ,582 |
| C4.9  | ,405 | ,510 | ,536 | ,496 | ,519 | ,631 | ,596 | ,649 | ,427 | ,534  | ,572  | ,506  | ,547  | ,533 |
| C4.10 | ,721 | ,737 | ,656 | ,743 | ,671 | ,691 | ,603 | ,581 | ,577 | ,775  | ,733  | ,687  | ,417  | ,661 |
| C4.11 | ,531 | ,624 | ,575 | ,588 | ,604 | ,649 | ,663 | ,658 | ,454 | ,649  | ,808  | ,634  | ,511  | ,611 |
| C4.12 | ,546 | ,623 | ,689 | ,625 | ,656 | ,628 | ,581 | ,605 | ,651 | ,631  | ,538  | ,623  | ,411  | ,601 |
| C4.13 | ,656 | ,630 | ,560 | ,532 | ,601 | ,712 | ,642 | ,453 | ,512 | ,500  | ,481  | ,644  | ,459  | ,568 |
| C4.14 | ,721 | ,711 | ,591 | ,664 | ,657 | ,708 | ,542 | ,572 | ,556 | ,755  | ,653  | ,744  | ,479  | ,643 |
| C4.15 | ,540 | ,593 | ,502 | ,562 | ,520 | ,619 | ,526 | ,604 | ,388 | ,484  | ,509  | ,529  | ,576  | ,535 |
| C4.16 | ,672 | ,704 | ,620 | ,671 | ,650 | ,564 | ,461 | ,571 | ,624 | ,648  | ,489  | ,666  | ,549  | ,607 |
| C4.17 | ,553 | ,604 | ,511 | ,551 | ,617 | ,611 | ,488 | ,522 | ,450 | ,639  | ,621  | ,674  | ,195  | ,541 |

*Appendix Table 30. Correlation scores between items of C5 and items of C6*

|      | C5.1 | C5.2 | C5.3 | C5.4 | C5.5 | C5.6 | C5.7 | C5.8 | C5.9 | C5.10 | C5.11 | C5.12 | C5.13 | Mean |
|------|------|------|------|------|------|------|------|------|------|-------|-------|-------|-------|------|
| C6.1 | ,796 | ,794 | ,718 | ,808 | ,784 | ,722 | ,630 | ,635 | ,678 | ,771  | ,679  | ,685  | ,499  | ,708 |
| C6.2 | ,732 | ,689 | ,719 | ,756 | ,749 | ,701 | ,663 | ,605 | ,682 | ,684  | ,610  | ,656  | ,422  | ,667 |
| C6.3 | ,751 | ,780 | ,761 | ,818 | ,775 | ,757 | ,681 | ,685 | ,719 | ,712  | ,560  | ,683  | ,600  | ,714 |
| C6.4 | ,734 | ,766 | ,703 | ,737 | ,744 | ,647 | ,580 | ,596 | ,630 | ,778  | ,607  | ,659  | ,486  | ,667 |
| C6.5 | ,660 | ,579 | ,634 | ,683 | ,634 | ,627 | ,559 | ,528 | ,740 | ,657  | ,499  | ,583  | ,509  | ,607 |
| C6.6 | ,766 | ,771 | ,733 | ,750 | ,768 | ,719 | ,697 | ,637 | ,723 | ,804  | ,664  | ,742  | ,492  | ,713 |
| C6.7 | ,831 | ,767 | ,778 | ,765 | ,752 | ,725 | ,607 | ,615 | ,746 | ,717  | ,594  | ,723  | ,552  | ,706 |
| C6.8 | ,737 | ,694 | ,725 | ,701 | ,683 | ,733 | ,676 | ,678 | ,688 | ,680  | ,698  | ,668  | ,649  | ,693 |
| C6.9 | ,751 | ,693 | ,734 | ,728 | ,637 | ,704 | ,626 | ,716 | ,701 | ,643  | ,588  | ,591  | ,643  | ,673 |

**Appendix Table 31. Correlation matrix C6 Enabling and Managing Change**

|      | C6.1 | C6.2 | C6.3 | C6.4 | C6.5 | C6.6 | C6.7 | C6.8 | C6.9 |
|------|------|------|------|------|------|------|------|------|------|
| C6.1 |      |      |      |      |      |      |      |      |      |
| C6.2 | ,833 |      |      |      |      |      |      |      |      |

|            |      |      |      |      |      |      |      |      |      |
|------------|------|------|------|------|------|------|------|------|------|
| C6.3       | ,849 | ,818 |      |      |      |      |      |      |      |
| C6.4       | ,816 | ,853 | ,870 |      |      |      |      |      |      |
| C6.5       | ,762 | ,795 | ,777 | ,747 |      |      |      |      |      |
| C6.6       | ,822 | ,878 | ,844 | ,882 | ,831 |      |      |      |      |
| C6.7       | ,824 | ,835 | ,820 | ,819 | ,769 | ,875 |      |      |      |
| C6.8       | ,755 | ,793 | ,776 | ,767 | ,753 | ,807 | ,897 |      |      |
| C6.9       | ,726 | ,715 | ,763 | ,692 | ,743 | ,742 | ,871 | ,919 |      |
| Mean       | ,798 | ,815 | ,815 | ,806 | ,772 | ,835 | ,839 | ,808 | ,771 |
| Mean total | ,807 |      |      |      |      |      |      |      |      |

*Appendix Table 32. Correlation scores between items of C6 and items of C1*

|       | C6.1 | C6.2 | C6.3 | C6.4 | C6.5 | C6.6 | C6.7 | C6.8 | C6.9 | Mean |
|-------|------|------|------|------|------|------|------|------|------|------|
| C1.1  | ,582 | ,556 | ,535 | ,579 | ,500 | ,596 | ,586 | ,632 | ,614 | ,576 |
| C1.2  | ,461 | ,480 | ,439 | ,448 | ,331 | ,470 | ,452 | ,475 | ,447 | ,445 |
| C1.3  | ,625 | ,478 | ,537 | ,481 | ,504 | ,539 | ,620 | ,556 | ,596 | ,548 |
| C1.4  | ,502 | ,454 | ,496 | ,490 | ,492 | ,484 | ,547 | ,538 | ,536 | ,504 |
| C1.5  | ,600 | ,564 | ,556 | ,585 | ,561 | ,589 | ,577 | ,603 | ,572 | ,579 |
| C1.6  | ,622 | ,702 | ,598 | ,575 | ,638 | ,643 | ,571 | ,626 | ,558 | ,615 |
| C1.7  | ,553 | ,545 | ,536 | ,526 | ,518 | ,609 | ,549 | ,615 | ,624 | ,564 |
| C1.8  | ,525 | ,522 | ,613 | ,606 | ,524 | ,546 | ,579 | ,611 | ,633 | ,573 |
| C1.9  | ,687 | ,707 | ,700 | ,705 | ,687 | ,749 | ,750 | ,808 | ,752 | ,727 |
| C1.10 | ,692 | ,677 | ,675 | ,701 | ,625 | ,710 | ,702 | ,732 | ,695 | ,690 |
| C1.11 | ,597 | ,582 | ,644 | ,584 | ,609 | ,623 | ,676 | ,672 | ,719 | ,634 |
| C1.12 | ,554 | ,581 | ,505 | ,520 | ,486 | ,583 | ,568 | ,568 | ,506 | ,541 |
| C1.13 | ,738 | ,702 | ,687 | ,656 | ,665 | ,725 | ,761 | ,715 | ,668 | ,702 |

*Appendix Table 33. Correlation scores between items of C6 and items of C2*

|      | C6.1  | C6.2 | C6.3 | C6.4  | C6.5  | C6.6 | C6.7  | C6.8  | C6.9  | Mean  |
|------|-------|------|------|-------|-------|------|-------|-------|-------|-------|
| C2.1 | -,003 | ,032 | ,160 | ,057  | -,010 | ,130 | ,011  | -,109 | -,074 | ,022  |
| C2.2 | -,072 | ,041 | ,025 | -,030 | -,042 | ,010 | -,031 | -,043 | -,020 | -,018 |
| C2.3 | ,675  | ,696 | ,625 | ,665  | ,667  | ,684 | ,607  | ,670  | ,591  | ,653  |
| C2.4 | ,733  | ,743 | ,694 | ,739  | ,651  | ,749 | ,659  | ,701  | ,676  | ,705  |
| C2.5 | ,667  | ,723 | ,660 | ,674  | ,672  | ,738 | ,656  | ,746  | ,645  | ,687  |
| C2.6 | ,737  | ,752 | ,731 | ,729  | ,692  | ,780 | ,709  | ,763  | ,735  | ,736  |



|       |      |      |      |      |      |      |      |      |      |      |
|-------|------|------|------|------|------|------|------|------|------|------|
| C2.7  | ,689 | ,759 | ,661 | ,740 | ,700 | ,806 | ,694 | ,673 | ,620 | ,705 |
| C2.8  | ,644 | ,738 | ,654 | ,737 | ,638 | ,773 | ,664 | ,693 | ,669 | ,690 |
| C2.9  | ,739 | ,657 | ,692 | ,727 | ,725 | ,734 | ,726 | ,686 | ,707 | ,710 |
| C2.10 | ,744 | ,718 | ,710 | ,681 | ,777 | ,724 | ,717 | ,674 | ,696 | ,716 |
| C2.11 | ,738 | ,721 | ,708 | ,684 | ,747 | ,708 | ,667 | ,579 | ,621 | ,686 |
| C2.12 | ,718 | ,730 | ,642 | ,703 | ,701 | ,755 | ,734 | ,743 | ,723 | ,717 |
| C2.13 | ,600 | ,582 | ,606 | ,592 | ,468 | ,649 | ,709 | ,569 | ,599 | ,597 |
| C2.14 | ,694 | ,572 | ,683 | ,616 | ,500 | ,632 | ,631 | ,591 | ,578 | ,611 |
| C2.15 | ,840 | ,816 | ,755 | ,693 | ,798 | ,772 | ,777 | ,757 | ,687 | ,766 |
| C2.16 | ,794 | ,736 | ,724 | ,653 | ,754 | ,700 | ,737 | ,734 | ,737 | ,730 |
| C2.17 | ,699 | ,743 | ,708 | ,719 | ,634 | ,746 | ,707 | ,776 | ,735 | ,719 |

*Appendix Table 34. Correlation scores between items of C6 and items of C3*

|       | C6.1 | C6.2 | C6.3 | C6.4 | C6.5 | C6.6 | C6.7 | C6.8 | C6.9 | Mean |
|-------|------|------|------|------|------|------|------|------|------|------|
| C3.1  | ,648 | ,677 | ,677 | ,563 | ,576 | ,626 | ,587 | ,524 | ,561 | ,604 |
| C3.2  | ,707 | ,661 | ,643 | ,552 | ,581 | ,638 | ,582 | ,516 | ,554 | ,604 |
| C3.3  | ,736 | ,721 | ,730 | ,611 | ,668 | ,693 | ,638 | ,613 | ,610 | ,669 |
| C3.4  | ,765 | ,639 | ,733 | ,595 | ,573 | ,586 | ,633 | ,566 | ,596 | ,632 |
| C3.5  | ,721 | ,708 | ,580 | ,580 | ,711 | ,696 | ,654 | ,575 | ,536 | ,640 |
| C3.6  | ,673 | ,628 | ,634 | ,582 | ,614 | ,625 | ,607 | ,538 | ,503 | ,600 |
| C3.7  | ,734 | ,689 | ,722 | ,592 | ,692 | ,690 | ,727 | ,796 | ,768 | ,712 |
| C3.8  | ,655 | ,603 | ,622 | ,512 | ,602 | ,627 | ,588 | ,615 | ,633 | ,606 |
| C3.9  | ,682 | ,572 | ,661 | ,588 | ,517 | ,624 | ,564 | ,485 | ,549 | ,582 |
| C3.10 | ,705 | ,622 | ,631 | ,548 | ,658 | ,576 | ,573 | ,511 | ,575 | ,600 |
| C3.11 | ,765 | ,761 | ,677 | ,642 | ,657 | ,699 | ,679 | ,635 | ,621 | ,682 |

*Appendix Table 35. Correlation scores between items of C6 and items of C4*

|      | C6.1 | C6.2 | C6.3 | C6.4 | C6.5 | C6.6 | C6.7 | C6.8 | C6.9 | Mean |
|------|------|------|------|------|------|------|------|------|------|------|
| C4.1 | ,571 | ,410 | ,615 | ,445 | ,384 | ,457 | ,422 | ,386 | ,404 | ,455 |
| C4.2 | ,534 | ,336 | ,522 | ,347 | ,286 | ,426 | ,404 | ,320 | ,353 | ,392 |
| C4.3 | ,515 | ,406 | ,560 | ,450 | ,320 | ,511 | ,421 | ,352 | ,363 | ,433 |
| C4.4 | ,582 | ,509 | ,605 | ,524 | ,494 | ,617 | ,601 | ,575 | ,556 | ,563 |

|       |      |      |      |      |      |      |      |      |      |      |
|-------|------|------|------|------|------|------|------|------|------|------|
| C4.5  | ,519 | ,490 | ,547 | ,460 | ,467 | ,593 | ,437 | ,553 | ,468 | ,504 |
| C4.6  | ,640 | ,572 | ,591 | ,512 | ,503 | ,567 | ,522 | ,481 | ,424 | ,535 |
| C4.7  | ,585 | ,464 | ,629 | ,540 | ,548 | ,553 | ,532 | ,505 | ,497 | ,539 |
| C4.8  | ,638 | ,537 | ,645 | ,584 | ,505 | ,618 | ,489 | ,532 | ,445 | ,555 |
| C4.9  | ,456 | ,365 | ,533 | ,429 | ,329 | ,413 | ,368 | ,516 | ,513 | ,436 |
| C4.10 | ,741 | ,615 | ,700 | ,676 | ,550 | ,670 | ,616 | ,604 | ,557 | ,637 |
| C4.11 | ,622 | ,509 | ,608 | ,550 | ,436 | ,545 | ,498 | ,623 | ,553 | ,549 |
| C4.12 | ,579 | ,495 | ,612 | ,481 | ,606 | ,590 | ,536 | ,576 | ,586 | ,562 |
| C4.13 | ,561 | ,521 | ,587 | ,471 | ,505 | ,626 | ,611 | ,528 | ,541 | ,550 |
| C4.14 | ,686 | ,611 | ,663 | ,623 | ,597 | ,714 | ,695 | ,601 | ,603 | ,644 |
| C4.15 | ,565 | ,395 | ,610 | ,434 | ,421 | ,467 | ,549 | ,611 | ,692 | ,527 |
| C4.16 | ,616 | ,534 | ,624 | ,624 | ,491 | ,634 | ,598 | ,542 | ,553 | ,580 |
| C4.17 | ,566 | ,545 | ,528 | ,564 | ,427 | ,613 | ,509 | ,453 | ,397 | ,511 |

*Appendix Table 36. Correlation scores between items of C6 and items of C5*

|       | C6.1 | C6.2 | C6.3 | C6.4 | C6.5 | C6.6 | C6.7 | C6.8 | C6.9 | Mean |
|-------|------|------|------|------|------|------|------|------|------|------|
| C5.1  | ,796 | ,732 | ,751 | ,734 | ,660 | ,766 | ,831 | ,737 | ,751 | ,751 |
| C5.2  | ,794 | ,689 | ,780 | ,766 | ,579 | ,771 | ,767 | ,694 | ,693 | ,726 |
| C5.3  | ,718 | ,719 | ,761 | ,703 | ,634 | ,733 | ,778 | ,725 | ,734 | ,723 |
| C5.4  | ,808 | ,756 | ,818 | ,737 | ,683 | ,750 | ,765 | ,701 | ,728 | ,750 |
| C5.5  | ,784 | ,749 | ,775 | ,744 | ,634 | ,768 | ,752 | ,683 | ,637 | ,725 |
| C5.6  | ,722 | ,701 | ,757 | ,647 | ,627 | ,719 | ,725 | ,733 | ,704 | ,704 |
| C5.7  | ,630 | ,663 | ,681 | ,580 | ,559 | ,697 | ,607 | ,676 | ,626 | ,635 |
| C5.8  | ,635 | ,605 | ,685 | ,596 | ,528 | ,637 | ,615 | ,678 | ,716 | ,633 |
| C5.9  | ,678 | ,682 | ,719 | ,630 | ,740 | ,723 | ,746 | ,688 | ,701 | ,701 |
| C5.10 | ,771 | ,684 | ,712 | ,778 | ,657 | ,804 | ,717 | ,680 | ,643 | ,716 |
| C5.11 | ,679 | ,610 | ,560 | ,607 | ,499 | ,664 | ,594 | ,698 | ,588 | ,611 |
| C5.12 | ,685 | ,656 | ,683 | ,659 | ,583 | ,742 | ,723 | ,668 | ,591 | ,666 |
| C5.13 | ,499 | ,422 | ,600 | ,486 | ,509 | ,492 | ,552 | ,649 | ,643 | ,539 |

## Appendix III Results of factor analysis, before and after modifications

### Subscale 1: Evidence-informed decision-making (C1)

Appendix Table 37. C1 Factor analysis all original items

| C1 original items: Total Variance Explained |       |                     |              |                                     |               |              |
|---------------------------------------------|-------|---------------------|--------------|-------------------------------------|---------------|--------------|
| Factor                                      | Total | Initial Eigenvalues |              | Extraction Sums of Squared Loadings |               |              |
|                                             |       | % of Variance       | Cumulative % | Total                               | % of Variance | Cumulative % |
| 1                                           | 9,416 | 72,432              | 72,432       | 9,132                               | 70,247        | 70,247       |
| 2                                           | ,920  | 7,074               | 79,506       |                                     |               |              |
| 3                                           | ,561  | 4,314               | 83,820       |                                     |               |              |
| 4                                           | ,478  | 3,674               | 87,494       |                                     |               |              |
| 5                                           | ,377  | 2,899               | 90,392       |                                     |               |              |
| 6                                           | ,285  | 2,190               | 92,582       |                                     |               |              |
| 7                                           | ,244  | 1,875               | 94,458       |                                     |               |              |
| 8                                           | ,215  | 1,652               | 96,109       |                                     |               |              |
| 9                                           | ,152  | 1,171               | 97,280       |                                     |               |              |
| 10                                          | ,121  | ,935                | 98,215       |                                     |               |              |
| 11                                          | ,104  | ,801                | 99,016       |                                     |               |              |
| 12                                          | ,068  | ,524                | 99,540       |                                     |               |              |
| 13                                          | ,060  | ,460                | 100,000      |                                     |               |              |

Appendix Figure 1. Scree Plot factor analysis C1 all original items

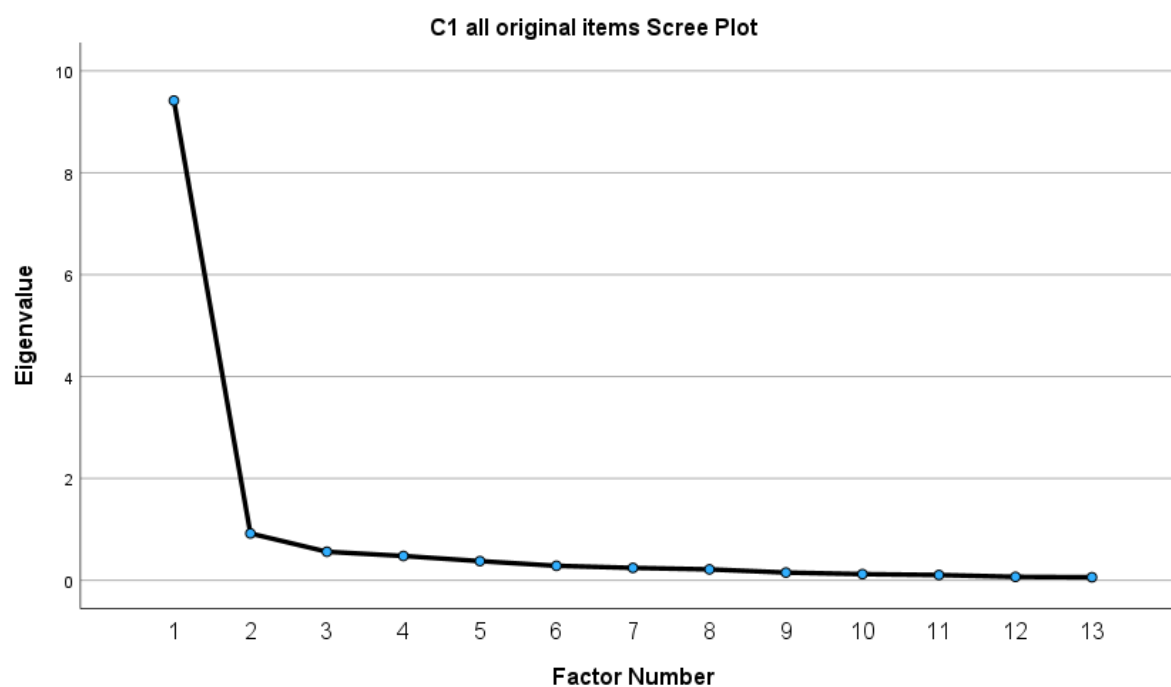

Appendix Table 38. C1 Factor analysis after modifications

| C1 item 1.13 removed: Total Variance Explained |       |                     |              |                                     |               |              |
|------------------------------------------------|-------|---------------------|--------------|-------------------------------------|---------------|--------------|
| Factor                                         | Total | Initial Eigenvalues |              | Extraction Sums of Squared Loadings |               |              |
|                                                |       | % of Variance       | Cumulative % | Total                               | % of Variance | Cumulative % |
| 1                                              | 8,754 | 72,951              | 72,951       | 8,475                               | 70,623        | 70,623       |
| 2                                              | ,902  | 7,515               | 80,465       |                                     |               |              |
| 3                                              | ,541  | 4,511               | 84,976       |                                     |               |              |
| 4                                              | ,422  | 3,513               | 88,489       |                                     |               |              |
| 5                                              | ,302  | 2,516               | 91,005       |                                     |               |              |
| 6                                              | ,279  | 2,322               | 93,327       |                                     |               |              |
| 7                                              | ,225  | 1,873               | 95,200       |                                     |               |              |
| 8                                              | ,190  | 1,581               | 96,781       |                                     |               |              |
| 9                                              | ,151  | 1,257               | 98,039       |                                     |               |              |
| 10                                             | ,104  | ,871                | 98,909       |                                     |               |              |
| 11                                             | ,070  | ,586                | 99,496       |                                     |               |              |
| 12                                             | ,061  | ,504                | 100,000      |                                     |               |              |

Appendix Figure 2. Scree Plot C1 factor analysis after modifications

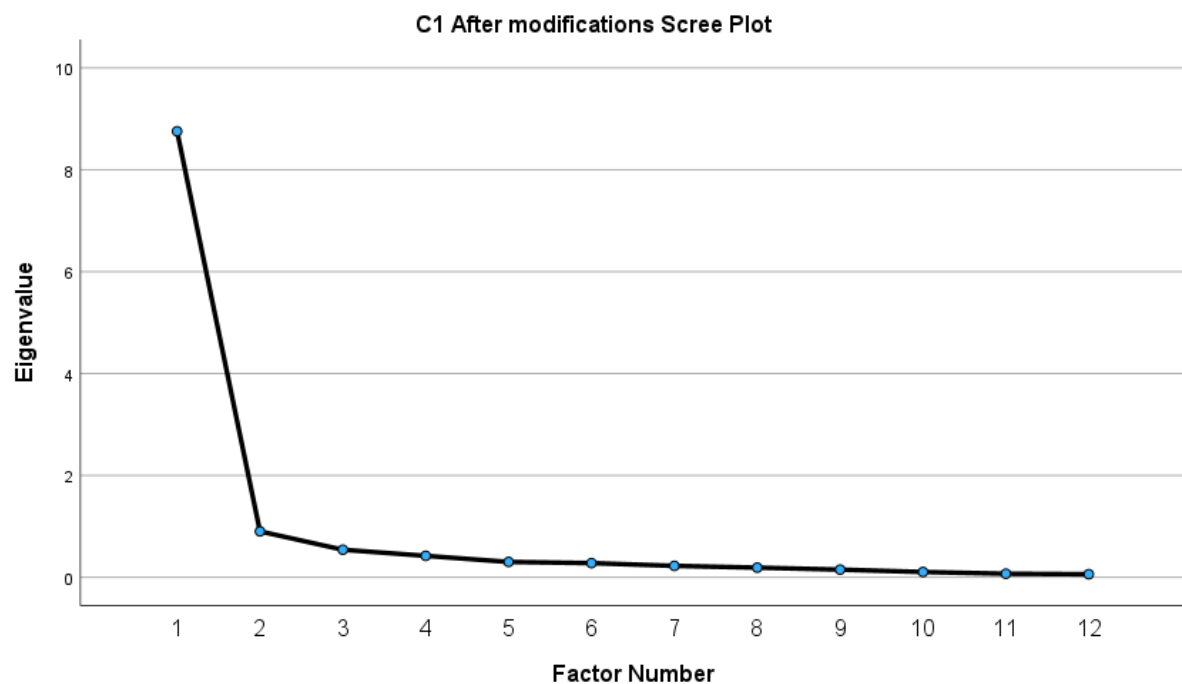

## Subscale 2: Operations, administration and resource management (C2)

Appendix Table 39. C2 Factor analysis all original items

| C2 Original items: Total Variance Explained |       |                     |              |                                     |               |              |
|---------------------------------------------|-------|---------------------|--------------|-------------------------------------|---------------|--------------|
| Factor                                      | Total | Initial Eigenvalues |              | Extraction Sums of Squared Loadings |               |              |
|                                             |       | % of Variance       | Cumulative % | Total                               | % of Variance | Cumulative % |

|    |       |        |         |       |        |        |
|----|-------|--------|---------|-------|--------|--------|
| 1  | 9,916 | 58,331 | 58,331  | 9,740 | 57,295 | 57,295 |
| 2  | 1,969 | 11,581 | 69,912  | 1,868 | 10,991 | 68,286 |
| 3  | 1,237 | 7,274  | 77,186  | 1,042 | 6,128  | 74,414 |
| 4  | 1,119 | 6,582  | 83,768  | ,807  | 4,746  | 79,160 |
| 5  | ,911  | 5,360  | 89,128  |       |        |        |
| 6  | ,620  | 3,647  | 92,775  |       |        |        |
| 7  | ,334  | 1,965  | 94,739  |       |        |        |
| 8  | ,259  | 1,521  | 96,260  |       |        |        |
| 9  | ,173  | 1,019  | 97,279  |       |        |        |
| 10 | ,110  | ,649   | 97,929  |       |        |        |
| 11 | ,107  | ,628   | 98,557  |       |        |        |
| 12 | ,062  | ,368   | 98,924  |       |        |        |
| 13 | ,056  | ,331   | 99,255  |       |        |        |
| 14 | ,044  | ,258   | 99,513  |       |        |        |
| 15 | ,040  | ,237   | 99,750  |       |        |        |
| 16 | ,029  | ,170   | 99,920  |       |        |        |
| 17 | ,014  | ,080   | 100,000 |       |        |        |

Rotation Sums of Squared Loadings

| Total | % of Variance | Cumulative % |
|-------|---------------|--------------|
| 5,063 | 29,782        | 29,782       |
| 3,546 | 20,858        | 50,640       |
| 2,981 | 17,535        | 68,175       |
| 1,867 | 10,985        | 79,160       |

Appendix Figure 3. Scree Plot C2 factor analysis all original items

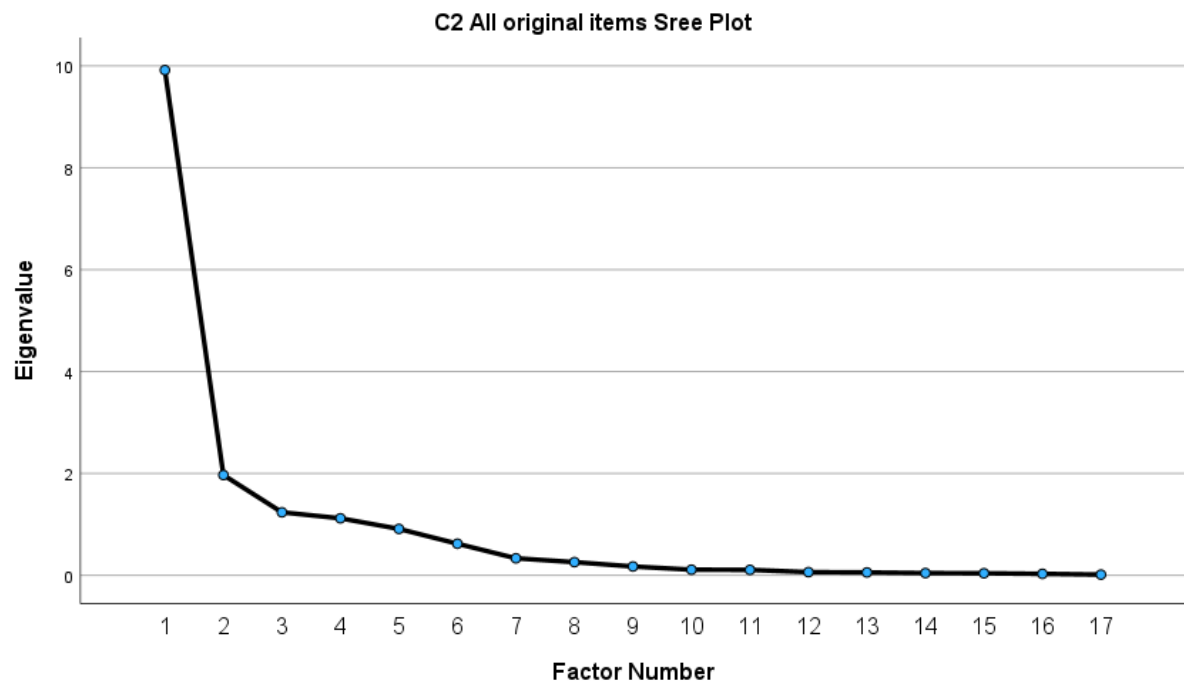

Appendix Table 40. C2 Factor analysis after modifications

| C2 items C2.1, C2.2, C2.14, C2.15 and C2.16 removed: Total Variance Explained |       |                     |              |                                     |               |              |
|-------------------------------------------------------------------------------|-------|---------------------|--------------|-------------------------------------|---------------|--------------|
| Factor                                                                        | Total | Initial Eigenvalues |              | Extraction Sums of Squared Loadings |               |              |
|                                                                               |       | % of Variance       | Cumulative % | Total                               | % of Variance | Cumulative % |
| 1                                                                             | 9,594 | 79,947              | 79,947       | 9,394                               | 78,281        | 78,281       |
| 2                                                                             | ,727  | 6,061               | 86,007       |                                     |               |              |
| 3                                                                             | ,541  | 4,508               | 90,515       |                                     |               |              |
| 4                                                                             | ,420  | 3,496               | 94,012       |                                     |               |              |
| 5                                                                             | ,188  | 1,567               | 95,579       |                                     |               |              |
| 6                                                                             | ,163  | 1,362               | 96,941       |                                     |               |              |
| 7                                                                             | ,129  | 1,079               | 98,020       |                                     |               |              |
| 8                                                                             | ,077  | ,641                | 98,661       |                                     |               |              |
| 9                                                                             | ,064  | ,537                | 99,198       |                                     |               |              |
| 10                                                                            | ,045  | ,372                | 99,570       |                                     |               |              |
| 11                                                                            | ,030  | ,247                | 99,816       |                                     |               |              |
| 12                                                                            | ,022  | ,184                | 100,000      |                                     |               |              |

Appendix Figure 4. C2 Scree Plot factor analysis after modification

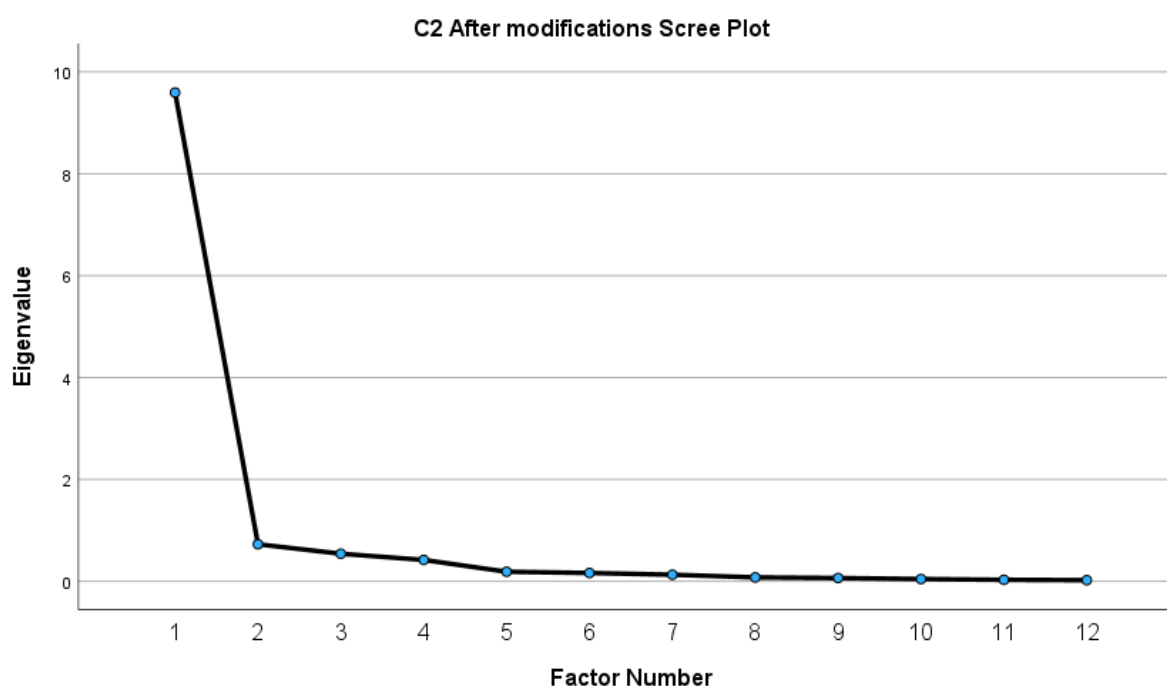

Subscale 3: Demonstrated knowledge of healthcare environment and the organization (C3)

Appendix Table 41. C3 Factor analysis all original items

| C3 Original items: Total Variance Explained |       |                     |              |                                     |               |              |
|---------------------------------------------|-------|---------------------|--------------|-------------------------------------|---------------|--------------|
| Factor                                      | Total | Initial Eigenvalues |              | Extraction Sums of Squared Loadings |               |              |
|                                             |       | % of Variance       | Cumulative % | Total                               | % of Variance | Cumulative % |
| 1                                           | 7,766 | 70,598              | 70,598       | 7,457                               | 67,786        | 67,786       |

|    |      |       |         |  |  |  |
|----|------|-------|---------|--|--|--|
| 2  | ,930 | 8,456 | 79,054  |  |  |  |
| 3  | ,627 | 5,698 | 84,752  |  |  |  |
| 4  | ,496 | 4,509 | 89,261  |  |  |  |
| 5  | ,362 | 3,289 | 92,550  |  |  |  |
| 6  | ,243 | 2,207 | 94,757  |  |  |  |
| 7  | ,213 | 1,940 | 96,697  |  |  |  |
| 8  | ,132 | 1,203 | 97,901  |  |  |  |
| 9  | ,089 | ,810  | 98,711  |  |  |  |
| 10 | ,080 | ,724  | 99,435  |  |  |  |
| 11 | ,062 | ,565  | 100,000 |  |  |  |

Appendix Figure 5. C3 Scree Plot factor analysis all original items

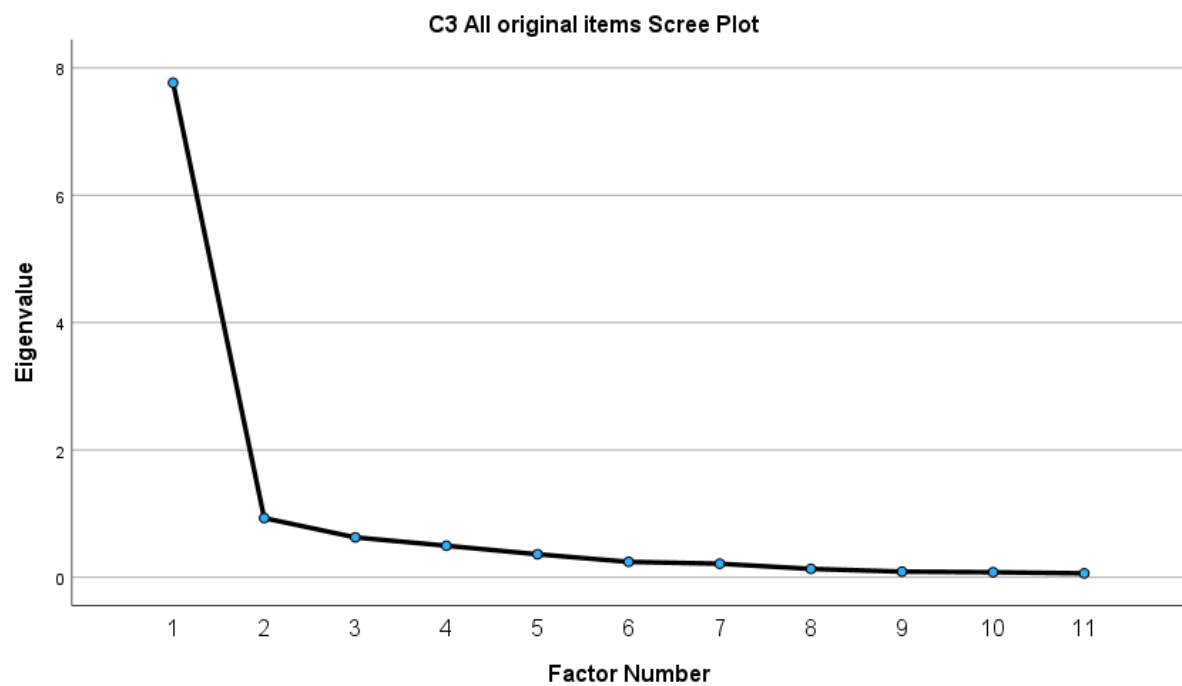

Table 42 C3 Factor analysis after modification

| <b>C3 item 3.7 removed: Total Variance Explained</b> |       |                     |              |                                     |               |              |
|------------------------------------------------------|-------|---------------------|--------------|-------------------------------------|---------------|--------------|
| Factor                                               | Total | Initial Eigenvalues |              | Extraction Sums of Squared Loadings |               |              |
|                                                      |       | % of Variance       | Cumulative % | Total                               | % of Variance | Cumulative % |
| 1                                                    | 7,173 | 71,730              | 71,730       | 6,878                               | 68,785        | 68,785       |
| 2                                                    | ,823  | 8,228               | 79,958       |                                     |               |              |
| 3                                                    | ,547  | 5,470               | 85,428       |                                     |               |              |
| 4                                                    | ,495  | 4,945               | 90,373       |                                     |               |              |
| 5                                                    | ,329  | 3,287               | 93,660       |                                     |               |              |
| 6                                                    | ,214  | 2,137               | 95,797       |                                     |               |              |
| 7                                                    | ,170  | 1,698               | 97,495       |                                     |               |              |
| 8                                                    | ,104  | 1,036               | 98,531       |                                     |               |              |
| 9                                                    | ,084  | ,842                | 99,373       |                                     |               |              |
| 10                                                   | ,063  | ,627                | 100,000      |                                     |               |              |

Appendix Figure 6. C3 Scree Plot factor analysis after modification

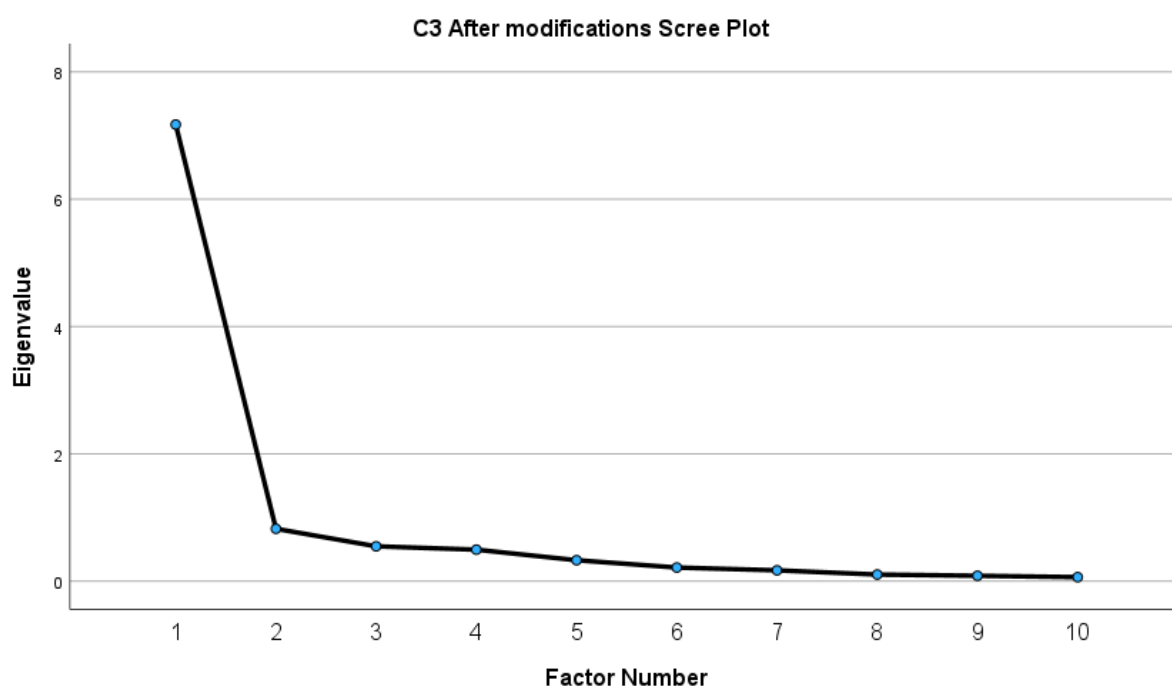

Subscale 4: Interpersonal, communication qualities and relationship management (C4)

Appendix Table 43. C4 Factor analysis all original items

| C4 Original items: Total Variance Explained |        |                     |              |                                     |               |              |
|---------------------------------------------|--------|---------------------|--------------|-------------------------------------|---------------|--------------|
| Factor                                      | Total  | Initial Eigenvalues |              | Extraction Sums of Squared Loadings |               |              |
|                                             |        | % of Variance       | Cumulative % | Total                               | % of Variance | Cumulative % |
| 1                                           | 10,735 | 63,146              | 63,146       | 10,405                              | 61,203        | 61,203       |
| 2                                           | 1,032  | 6,070               | 69,216       | ,669                                | 3,935         | 65,138       |
| 3                                           | ,913   | 5,371               | 74,587       |                                     |               |              |
| 4                                           | ,828   | 4,872               | 79,459       |                                     |               |              |
| 5                                           | ,729   | 4,290               | 83,749       |                                     |               |              |
| 6                                           | ,624   | 3,668               | 87,418       |                                     |               |              |
| 7                                           | ,476   | 2,800               | 90,217       |                                     |               |              |
| 8                                           | ,354   | 2,084               | 92,301       |                                     |               |              |
| 9                                           | ,310   | 1,821               | 94,122       |                                     |               |              |
| 10                                          | ,224   | 1,315               | 95,437       |                                     |               |              |
| 11                                          | ,202   | 1,188               | 97,623       |                                     |               |              |
| 12                                          | ,170   | ,998                | 97,623       |                                     |               |              |
| 13                                          | ,133   | ,782                | 98,405       |                                     |               |              |
| 14                                          | ,124   | ,730                | 99,136       |                                     |               |              |
| 15                                          | ,064   | ,376                | 99,512       |                                     |               |              |
| 16                                          | ,051   | ,300                | 99,812       |                                     |               |              |
| 17                                          | ,032   | ,188                | 100,000      |                                     |               |              |



Appendix Figure 7. C4 Scree Plot factor analysis all original items

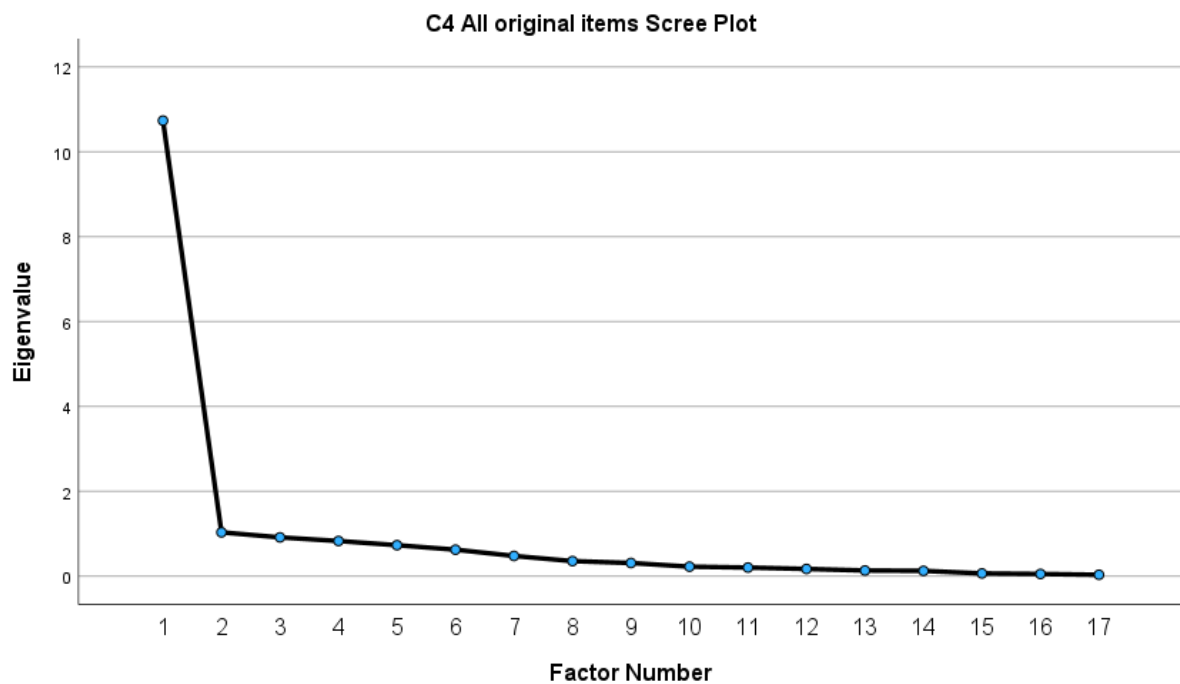

Appendix Table 44. C4 Factor analysis after modification

| C4 item 2.14 added: Total Variance Explained |        |                     |              |                                     |               |              |
|----------------------------------------------|--------|---------------------|--------------|-------------------------------------|---------------|--------------|
| Factor                                       | Total  | Initial Eigenvalues |              | Extraction Sums of Squared Loadings |               |              |
|                                              |        | % of Variance       | Cumulative % | Total                               | % of Variance | Cumulative % |
| 1                                            | 11,428 | 63,488              | 63,488       | 11,060                              | 61,443        | 61,443       |
| 2                                            | ,964   | 5,355               | 68,843       |                                     |               |              |
| 3                                            | ,959   | 5,329               | 74,172       |                                     |               |              |
| 4                                            | ,841   | 4,672               | 78,844       |                                     |               |              |
| 5                                            | ,769   | 4,270               | 83,114       |                                     |               |              |
| 6                                            | ,679   | 3,771               | 86,885       |                                     |               |              |
| 7                                            | ,448   | 2,491               | 89,376       |                                     |               |              |
| 8                                            | ,363   | 2,015               | 91,391       |                                     |               |              |
| 9                                            | ,331   | 1,841               | 93,232       |                                     |               |              |
| 10                                           | ,276   | 1,534               | 94,766       |                                     |               |              |
| 11                                           | ,225   | 1,253               | 96,019       |                                     |               |              |
| 12                                           | ,166   | ,923                | 96,942       |                                     |               |              |
| 13                                           | ,151   | ,837                | 97,779       |                                     |               |              |
| 14                                           | ,136   | ,755                | 98,534       |                                     |               |              |
| 15                                           | ,122   | ,679                | 99,213       |                                     |               |              |
| 16                                           | ,064   | ,356                | 99,569       |                                     |               |              |
| 17                                           | ,045   | ,250                | 99,819       |                                     |               |              |
| 18                                           | ,033   | ,181                | 100,000      |                                     |               |              |

Appendix Figure 8. C4 Scree Plot factor analysis after modification

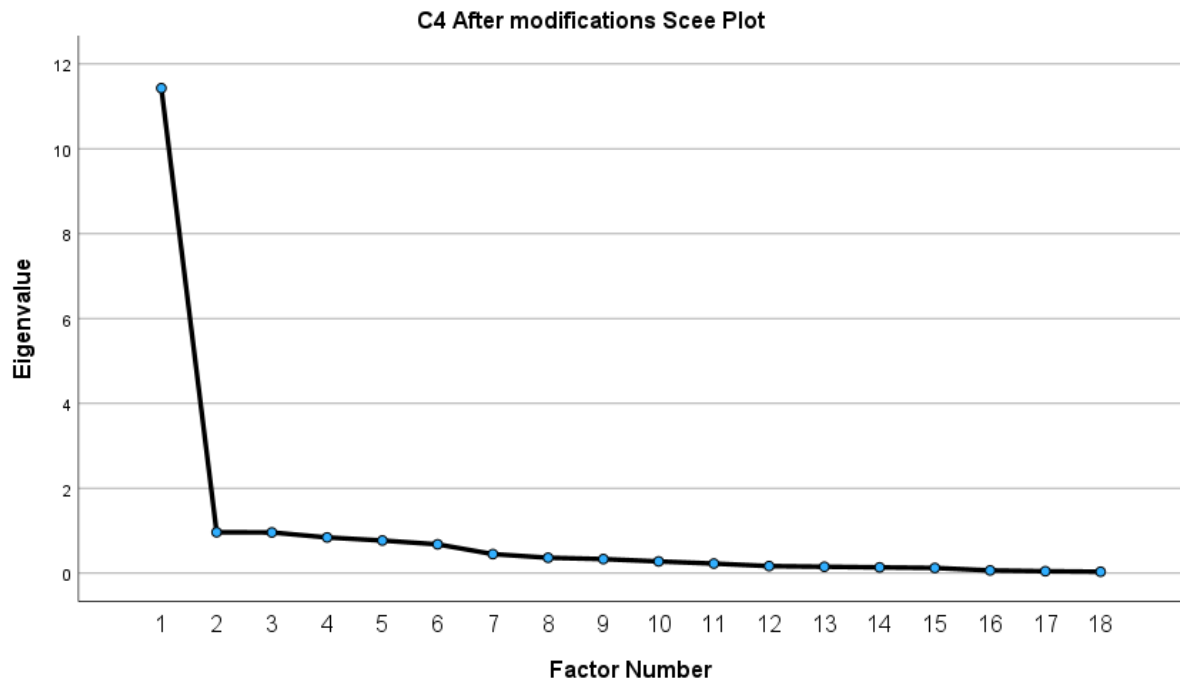

### Subscale 5: Leading people and organization (C5)

Appendix Table 45. C5 Factor analysis all original items

| C5 Original items: Total Variance Explained |       |                     |              |                                     |               |              |
|---------------------------------------------|-------|---------------------|--------------|-------------------------------------|---------------|--------------|
| Factor                                      | Total | Initial Eigenvalues |              | Extraction Sums of Squared Loadings |               |              |
|                                             |       | % of Variance       | Cumulative % | Total                               | % of Variance | Cumulative % |
| 1                                           | 9,745 | 74,962              | 74,962       | 9,486                               | 72,973        | 72,973       |
| 2                                           | ,708  | 5,449               | 80,410       |                                     |               |              |
| 3                                           | ,606  | 4,664               | 85,074       |                                     |               |              |
| 4                                           | ,496  | 3,818               | 88,892       |                                     |               |              |
| 5                                           | ,332  | 2,551               | 91,443       |                                     |               |              |
| 6                                           | ,257  | 1,979               | 93,422       |                                     |               |              |
| 7                                           | ,235  | 1,811               | 95,233       |                                     |               |              |
| 8                                           | ,204  | 1,567               | 96,800       |                                     |               |              |
| 9                                           | ,140  | 1,077               | 97,876       |                                     |               |              |
| 10                                          | ,110  | ,843                | 98,720       |                                     |               |              |
| 11                                          | ,084  | ,647                | 99,367       |                                     |               |              |
| 12                                          | ,051  | ,396                | 99,763       |                                     |               |              |
| 13                                          | ,031  | ,237                | 100,000      |                                     |               |              |

Appendix Figure 9. C5 Scree Plot factor analysis all original items

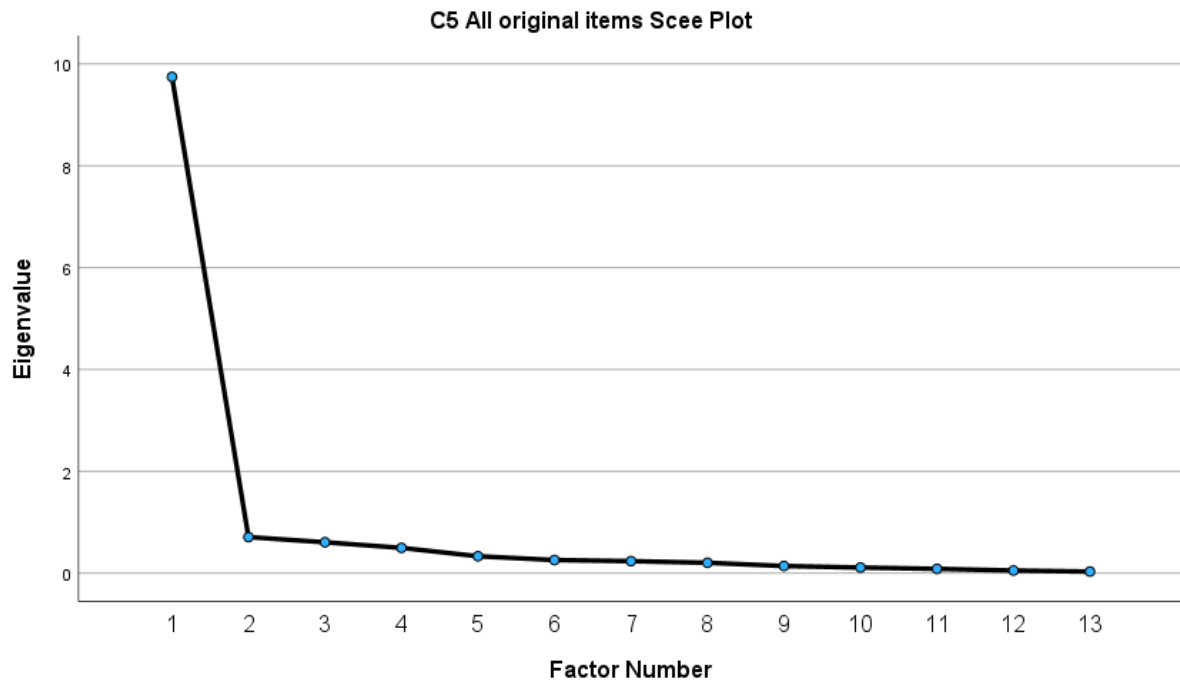

## Subscale 6: Enabling and Managing Change

Appendix Table 46. C6 Factor analysis all original items

| C6 Original items: Total Variance Explained |       |                     |              |                                     |               |              |
|---------------------------------------------|-------|---------------------|--------------|-------------------------------------|---------------|--------------|
| Factor                                      | Total | Initial Eigenvalues |              | Extraction Sums of Squared Loadings |               |              |
|                                             |       | % of Variance       | Cumulative % | Total                               | % of Variance | Cumulative % |
| 1                                           | 7,458 | 82,864              | 82,864       | 7,268                               | 80,757        | 80,757       |
| 2                                           | ,504  | 5,595               | 88,458       |                                     |               |              |
| 3                                           | ,280  | 3,111               | 91,569       |                                     |               |              |
| 4                                           | ,219  | 2,435               | 94,004       |                                     |               |              |
| 5                                           | ,184  | 2,049               | 96,052       |                                     |               |              |
| 6                                           | ,126  | 1,405               | 97,457       |                                     |               |              |
| 7                                           | ,098  | 1,093               | 98,551       |                                     |               |              |
| 8                                           | ,072  | ,797                | 99,347       |                                     |               |              |
| 9                                           | ,059  | ,653                | 100,000      |                                     |               |              |

Appendix Figure 10. C6 Scree Plot factor analysis all original items

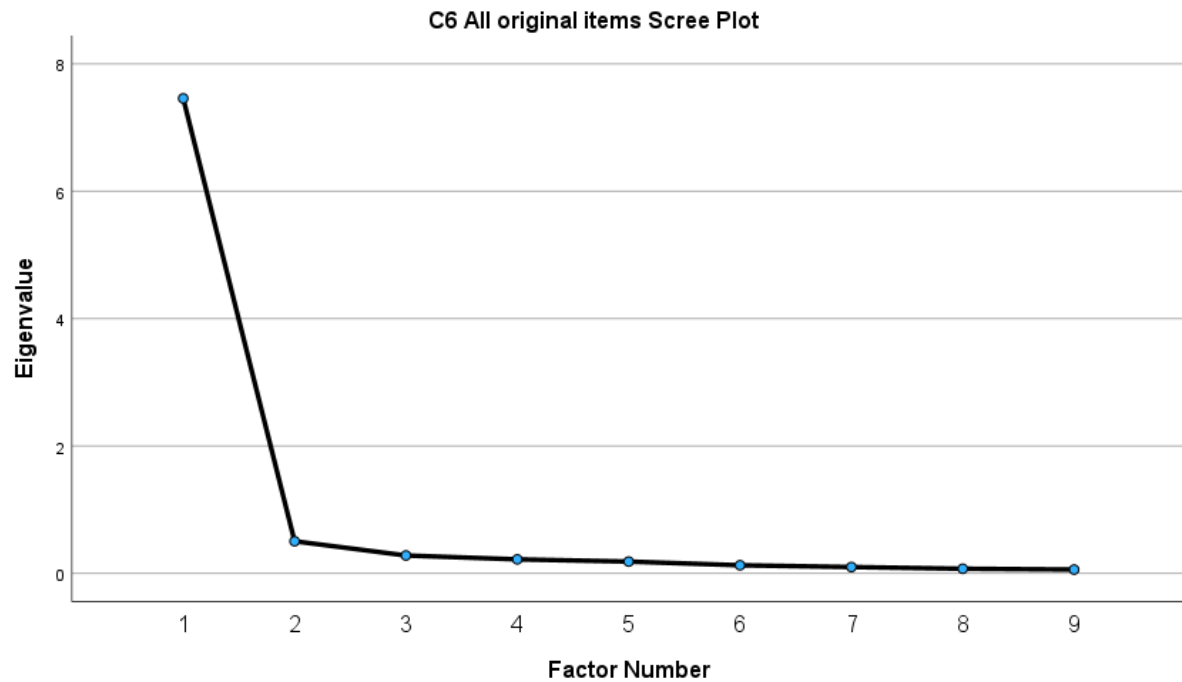

Appendix Table 47. C6 factor analysis after modification

| C6 item 2.15 and 2.16 added: Total Variance Explained |       |                     |              |                                     |               |              |
|-------------------------------------------------------|-------|---------------------|--------------|-------------------------------------|---------------|--------------|
| Factor                                                | Total | Initial Eigenvalues |              | Extraction Sums of Squared Loadings |               |              |
|                                                       |       | % of Variance       | Cumulative % | Total                               | % of Variance | Cumulative % |
| 1                                                     | 8,990 | 81,726              | 81,726       | 8,793                               | 79,938        | 79,938       |
| 2                                                     | ,518  | 4,712               | 86,438       |                                     |               |              |
| 3                                                     | ,407  | 3,696               | 90,134       |                                     |               |              |
| 4                                                     | ,280  | 2,546               | 92,680       |                                     |               |              |
| 5                                                     | ,224  | 2,034               | 94,714       |                                     |               |              |
| 6                                                     | ,165  | 1,503               | 96,217       |                                     |               |              |
| 7                                                     | ,128  | 1,167               | 97,383       |                                     |               |              |
| 8                                                     | ,108  | ,985                | 98,369       |                                     |               |              |
| 9                                                     | ,095  | ,861                | 99,230       |                                     |               |              |
| 10                                                    | ,046  | ,417                | 99,647       |                                     |               |              |
| 11                                                    | ,039  | ,353                | 100,000      |                                     |               |              |

Appendix Figure 11. C6 Scree Plot factor analysis after modification

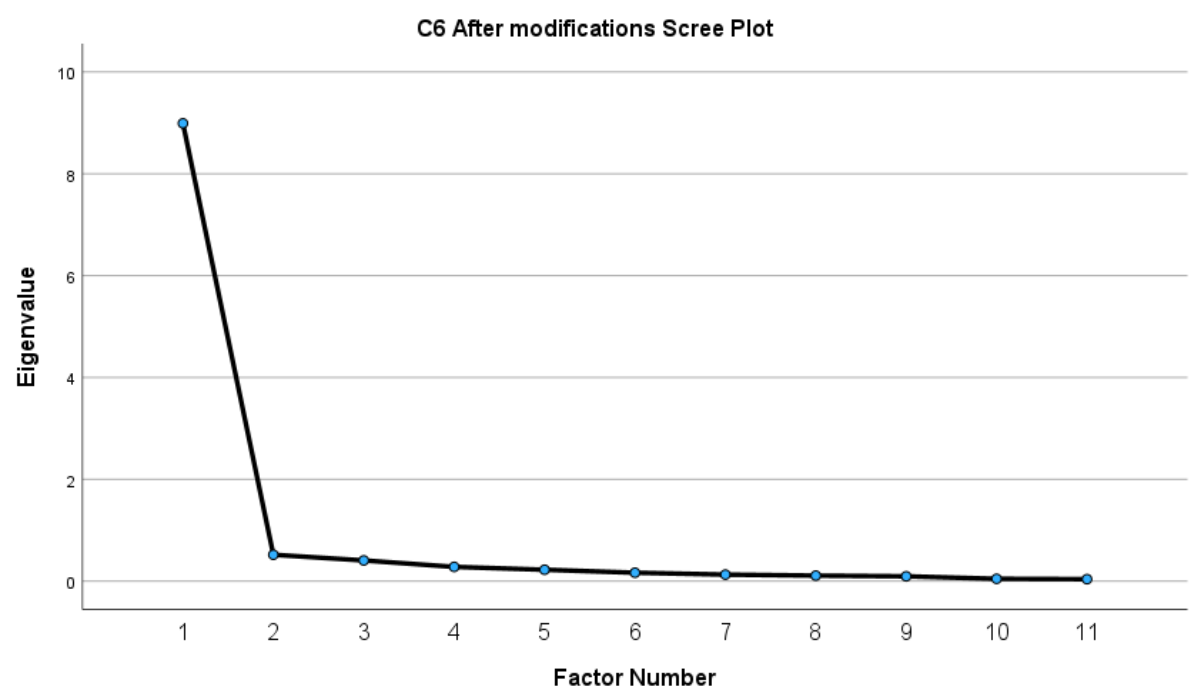

Supplement: Supplementary file 1 [file Appendices II & III 572228.pdf › Appendices II & III 572228.pdf]
